1     **The net charge of the K-loop regulates KIF1A superprocessivity by enhancing microtubule**  
2                             **affinity in the one-head-bound state**

3  
4 Taylor M. Zaniewski and William O. Hancock\*  
5 Departments of Chemistry and Biomedical Engineering, Pennsylvania State University,  
6 University Park, Pennsylvania, USA

7  
8  
9 \* Corresponding Author  
10 William O. Hancock  
11 122 CBEB  
12 University Park, PA 16802  
13 (814) 863-0492  
14 [wohl@psu.edu](mailto:wohl@psu.edu)  
15

16  
17  
18 **Acknowledgements:**

19 The authors thank Dr. Kristen Verhey for helpful discussions that resolved differences between  
20 the current results and previously published KIF1A data. The authors thank the Hancock lab group  
21 members for their helpful discussions, with particular thanks to Adheshwari Ramesh and Samira  
22 Bell for their help making the plasmids used in this study.

23  
24  
25 **Abstract:**

26 KIF1A is an essential neuronal transport motor protein in the kinesin-3 family, known for its  
27 superprocessive motility. We determined that superprocessivity of KIF1A dimers originates from  
28 a unique structural domain, the lysine rich insertion in loop-12 termed the ‘K-Loop’, which  
29 enhances electrostatic interactions between the motor and the microtubule. In 80 mM PIPES  
30 buffer, replacing the native loop-12 of KIF1A with that of kinesin-1, resulted in a 6-fold decrease  
31 in run length, and adding additional positive charge to loop-12 enhanced the run length.  
32 Interestingly, swapping the KIF1A loop-12 into kinesin-1 did not enhance its run length, consistent  
33 with the two motor families using different mechanochemical tuning to achieve persistent

34 transport. To investigate the mechanism by which the KIF1A K-loop enhances processivity, we  
35 used microtubule pelleting and single-molecule dwell times assays in ATP and ADP. First, the  
36 microtubule affinity was similar in ATP and in ADP, consistent with the motor spending the  
37 majority of its cycle in a weakly-bound state. Second, the microtubule affinity and single-molecule  
38 dwell time in ADP were 6-fold lower in the loop-swap mutant compared to wild type. Thus, the  
39 positive charge in loop-12 of KIF1A enhances the run length by stabilizing the motor binding in  
40 its vulnerable one-head-bound state. Finally, through a series of mutants with varying positive  
41 charge in the K-loop, we found that the KIF1A processivity is linearly dependent on the charge of  
42 loop-12.

43

#### 44 **Introduction**

45 KIF1A is a fast and superprocessive neuronal transport motor protein in the kinesin-3 family that  
46 is responsible for the delivery of synaptic vesicle precursors from the soma to the distal end of the  
47 axon, among other tasks.<sup>1-5</sup> Genetic mutations lead to KIF1A Associated Neurological Disorders  
48 (KAND), rare and often misdiagnosed afflictions.<sup>5-14</sup> The category of KAND is vast, with 113  
49 variants that have been identified in humans so far, making therapeutic attempts difficult.<sup>14</sup>  
50 Therefore, approaching treatments more systematically requires a deeper understanding of the  
51 fundamental mechanochemical mechanism of KIF1A.

52

53 A recent biochemical dissection of the KIF1A chemomechanical cycle concluded that: i) both ATP  
54 binding and hydrolysis are required to trigger tethered-head binding, ii) rear head detachment is  
55 fast and may contribute to the fast stepping rate, and iii) the motor spends the majority of its  
56 stepping cycle in a post-hydrolysis, one-head-bound (1HB) state.<sup>15</sup> This ability to remain  
57 associated with the microtubule in a “weakly-bound” state enhances the motor processivity by  
58 ensuring that the motor remains bound to the microtubule sufficiently long for the tethered head  
59 to complete its step and bind to the next site.<sup>16-18</sup> This property of remaining in a vulnerable one-  
60 head-bound state also provides an explanation for the propensity of KIF1A to detach readily under  
61 load.<sup>19-22</sup> A recent optical trapping study that used a three-bead geometry to minimize forces  
62 oriented perpendicular to the microtubule concluded that under load KIF1A is able to sustain loads  
63 by rapidly rebinding to the microtubule following disengagement.<sup>20</sup> Because KIF1A does not  
64 achieve high microtubule affinity by maximizing the duration spent in a strong binding two-head-

65 bound state, we proposed that the source of its processivity is a combination of a relatively slow  
66 detachment rate from the post-hydrolysis 1HB state and faster tethered-head attachment rate  
67 compared to kinesin-1 and -2.<sup>15</sup> The goal of the current study was to define the structural elements  
68 of KIF1A that underlie this kinetic tuning.

69

70 The kinesin-3 family is known for a unique structural domain called the K-Loop. This domain is  
71 a stretch of Loop-12 in which KIF1A contains six lysine residues and kinesin-1 and -2 only have  
72 one lysine.<sup>23</sup> In early work it was determined that the electrostatic interaction of the K-Loop with  
73 the microtubule facilitates diffusive motion, leading to monomeric motility of KIF1A.<sup>23-25</sup> The  
74 enhanced positive charge of KIF1A in this region is thought to interact with the glutamate rich C-  
75 terminal tail of tubulin, termed the 'E-hook'.<sup>26,27</sup> However, because these domains are disordered,  
76 and their structures and interactions not resolved by X-ray crystallography or CryoEM,<sup>26,28,29</sup>  
77 biochemical and single-molecule investigations are vital for understanding this interaction.

78

79 In the literature, there are conflicting reports regarding the role of the K-loop in KIFA  
80 superprocessivity, with some studies indicating that the K-loop is responsible for KIF1A  
81 superprocessivity,<sup>27,30</sup> and others suggesting that the K-loop plays no role in the processivity of  
82 KIF1A and only increases its microtubule on-rate.<sup>31</sup> This lack of consensus in the field has led to  
83 considerable confusion regarding the role of the K-loop in long distance intracellular transport. In  
84 the present study, we used single-molecule microscopy and stopped-flow biochemical experiments  
85 to clarify the role of loop-12 in KIF1A motility. By using a series of mutations, buffers, and  
86 experimental approaches, we determined that at near physiological ionic strength the K-loop  
87 enhances the processivity of KIF1A by strengthening the microtubule affinity of a vulnerable one-  
88 head-bound state in the KIF1A chemomechanical cycle. Additionally, this functionality cannot be  
89 transferred to kinesin-1, highlighting how different motor families use distinct biochemical tuning  
90 to achieve fast and processive motility.

91

92

## 93 **Results**

94

### 95 **Influence of the neck-coil and coiled-coil domains on KIF1A motility**

96 To understand how different structural elements of KIF1A contribute to its motility and to reconcile  
97 conflicting results in the literature, we designed constitutively active constructs of KIF1A that  
98 included different distal coiled-coil domains to ensure stable KIF1A dimers and included or  
99 excluded the native neck-coil domain of KIF1A. All of the KIF1A constructs are based on a  
100 truncated and constitutively active KIF1A dimer that has been used in a number of published  
101 studies.<sup>15,27,31,32</sup> The ‘neck-coil’, defined as residues 369-393 of *Rattus norvegicus* KIF1A, is a  
102 short coiled-coil domain that is immediately distal to the disordered neck linker domain and is  
103 involved in dimerization of the two motor domains.<sup>33,34</sup> Based on other members of the kinesin-3  
104 family, it is thought that in full-length KIF1A, coiled-coil 1 folds back on the neck-coil and forms  
105 an antiparallel coiled-coil that separates the two heads and inhibits motor activity.<sup>32,33</sup> It was shown  
106 previously that the neck-coil alone is insufficient to stably dimerize KIF1A,<sup>32-34</sup> and that this could  
107 be rectified by adding a leucine zipper (LZ) downstream of the neck-coil.<sup>19,27,32</sup> A second approach  
108 to dimerizing diverse kinesins has been to fuse the motor and neck linker domains to the coiled-  
109 coil domain of *D. melanogaster* kinesin-1.<sup>15,17,35-37</sup>

110

111 To directly compare how these different dimerization strategies affect KIF1A motility, we designed  
112 three dimeric, GFP-tagged *Rattus norvegicus* KIF1A constructs, as follows. The first construct  
113 consisted of KIF1A residues 1-393 followed by a leucine zipper domain and GFP, which we refer  
114 to as 1A-LZ (Fig. 1A). This construct matches those used in a number of published studies, albeit  
115 with different C-terminal tags.<sup>19,27,30,32</sup> We made two other constructs that achieved stable  
116 dimerization through the *Drosophila melanogaster* kinesin heavy chain (KHC) neck-coil and  
117 coiled-coil 1 domains (345-560). The first construct, which includes the KIF1A neck-coil, fused  
118 KIF1A(1-393) to residues 345-560 of KHC and a C-terminal GFP, which we refer to as 1A<sub>393</sub> (Fig.  
119 1A-B). The second construct, which does not include the KIF1A neck-coil and was used in a  
120 previous study,<sup>15</sup> fused KIF1A(1-368) to residues 345-560 of KHC and a C-terminal GFP. We refer  
121 to this as 1A<sub>368</sub> (Fig. 1A).

122

123 To reconcile the behavior of disparate constructs in the literature, the first question we addressed  
124 was whether the dimerization strategy affected the KIF1A run length in 80 mM PIPES (BRB80)  
125 buffer. We found that 1A-LZ had a 2-fold longer run length than 1A<sub>393</sub> ( $6.1 \pm 0.1$  and  $3.0 \pm 0.02$   
126  $\mu\text{m}$ , respectively; Fig. 1C with raw data in Fig. S1). We propose that this difference in processivity  
127 is due to the differential charge in the coiled-coil domains rather than differences in interhead  
128 coordination between the two constructs. The net charge of coil-1 of KIF1A, which these  
129 dimerization domains replace, is -6; the net charge of the kinesin-1 neck-coil (345-405) is -3; and  
130 the net charge of the leucine zipper is neutral (Fig. S2). It was shown previously that adding  
131 positive charge to the kinesin-1 coiled-coil enhances its run length and adding negative charge  
132 diminishes its run length.<sup>38</sup> Thus, we interpret the longer run length of 1A-LZ to be due to enhanced  
133 interaction between the coiled-coil domain and the negatively charged C-terminus of tubulin. One  
134 prediction of this hypothesis is that the motor off-rate in ADP, which induces a weak-binding state  
135 that doesn't involve coordinated activities of the two heads, should be similarly affected by the  
136 electrostatic interactions between the coiled-coil and the microtubule. To probe this question, we  
137 used TIRF microscopy to measure the microtubule dwell time of the two constructs in saturating  
138 ADP. Consistent with the run length differences, 1A<sub>393</sub>-LZ had a ~3-fold longer dwell time than  
139 1A<sub>393</sub> (Fig. 1F). Thus, because the negative net charge of the Kin1 neck-coil sequence better  
140 matches the native KIF1A, and because this domain has been used in a body of our previous work,  
141 we focused our efforts on the 1A<sub>393</sub> construct.

142  
143 Because the KIF1A neck-coil domain has been shown to be insufficient to form a stable dimer on  
144 its own,<sup>32</sup> it is possible that even in constructs dimerized by fusing a distal coiled-coil domain, the  
145 neck-coil does not form a stable connection between the two motor domains. This 'breathing' of  
146 the neck-coil could affect the interhead coordination necessary for processivity, consistent with  
147 previous work that showed extending the length of the kinesin neck linker, which connects each  
148 motor domain to their shared neck-coil, reduced motor run lengths.<sup>34,39-41</sup> To test whether the  
149 KIF1A neck-coil plays a role beyond dimerization, we used TIRF microscopy in BRB80 buffer to  
150 compare the run length of 1A<sub>393</sub>, which includes the neck-coil, to 1A<sub>368</sub>, which lacks the neck-coil  
151 (Fig. 1A). The two constructs had similar run lengths, indicating that the sequence and stability of  
152 the KIF1A neck-coil has no effect on its processivity (Fig. 1B, D). Consistent with the run lengths,  
153 the microtubule dwell times of the two motors in 2 mM ADP, which probes the affinity in the

154 weak-binding state, were also similar (Fig. 1G). We hypothesized that if there is any reversible  
155 dimerization in the KIF1A neck-coil, then it may have a stronger effect on kinesin-1, which has a  
156 shorter neck linker domain and thus a stiffer connection between the two heads than KIF1A.<sup>17,40–</sup>  
157 <sup>43</sup> To test this, we used *Drosophila* kinesin-1 truncated at residue 557 and fused to GFP, which has  
158 been used in numerous previous studies, and is referred to as Kin1 here.<sup>15,17,35,36</sup> The KIF1A neck-  
159 coil domain (KIF1A 369-393) was inserted just upstream of Ala<sub>345</sub> at the start of the neck-coil of  
160 Kin1 to generate K1<sub>1Anc</sub> (Fig. 1A).<sup>44</sup> In single-molecule assays, the Kin1 run length was  $0.8 \pm 0.02$   
161  $\mu\text{m/s}$  (Fig. 1E), which is consistent with previous work and is four-fold shorter than KIF1A (Fig.  
162 1C).<sup>17,35,36</sup> K1<sub>1Anc</sub> had a  $\sim 2$ -fold shorter run length than Kin1 ( $0.4 \pm 0.002 \mu\text{m}$ ; Fig. 1D) and also  
163 had a slightly slower velocity ( $0.5 \pm 0.2 \mu\text{m/s}$  versus  $0.7 \pm 0.2 \mu\text{m/s}$ ; Fig. 1E). It is unlikely that  
164 the shorter run length of K1<sub>1Anc</sub> results from differences in positive charge in the neck-coil domain,  
165 because both the kinesin-1 and KIF1A neck-coil domains are negatively charged ( $-3$  for Kin1 and  
166  $-2$  for KIF1A; Fig. S2). Instead, the shorter run length of K1<sub>1Anc</sub> is consistent with the KIF1A neck-  
167 coil dimerizing only weakly and acting as an extended neck linker in kinesin-1, loosening the  
168 connection between the two motor domains and reducing its performance.<sup>17,40–42</sup> In light of this, it  
169 is surprising that replacing the KIF1A neck-coil with the more stable kinesin-1 neck-coil does not  
170 enhance the KIF1A run length. However, the native neck linker domain of KIF1A is longer than  
171 that of kinesin-1,<sup>43</sup> and so one possibility is that stabilizing the KIF1A neck region by adding the  
172 kinesin-1 coiled-coil is not sufficient to establish a tight connection between the two heads. It  
173 follows that the superprocessivity of KIF1A does not result from tight mechanical connection  
174 between the heads to achieve coordinated stepping, but rather from other aspects of the motor's  
175 chemomechanics.

176

### 177 **Influence of ionic strength on KIF1A motility**

178 To better understand the role of electrostatic interactions in KIF1A motility and to reconcile diverse  
179 studies across the literature, we investigated the effect of buffer ionic strength on KIF1A motility.  
180 We chose two buffers commonly used in the literature: BRB80, which contains 80 mM PIPES and  
181 has a 173 mM ionic strength, and BRB12, which contains 12 mM PIPES and has a 26 mM ionic  
182 strength (both buffers also include 1 mM MgCl<sub>2</sub>, 1 mM EGTA, pH 6.9). Although much of the  
183 published work on KIF1A was performed in BRB12,<sup>19,27,31,32</sup> the ionic strength of BRB80 (173  
184 mM) is closer to the  $\sim 200$  mM ionic strength estimated in cells.<sup>45</sup> The low ionic strength of BRB12

185 is expected to maximize electrostatic interactions between motors and microtubules; for instance,  
186 the Debye length in BRB80 is 0.7 nm in BRB80 and 2 nm in BRB12.<sup>46</sup>  
187  
188 Consistent with enhanced electrostatic interactions, we found that 1A<sub>393</sub> had a nearly 5-fold longer  
189 run length in BRB12 compared to BRB80 ( $14.3 \pm 0.4 \mu\text{m}$  versus  $3.0 \pm 0.02$ ; Fig. 1C). Additionally,  
190 we observed increased pausing behavior at low ionic strength, as reported previously.<sup>27</sup> Thus, we  
191 quantified the segmented velocity (Fig. 1D) and found that the velocity decreased from  $1.5 \mu\text{m/s}$   
192 in BRB80 to  $1.1 \mu\text{m/s}$  in BRB12. The longer run length and slower velocity correspond to a  
193 substantially higher affinity of KIF1A for microtubules in BRB12 buffer. To compare the  
194 microtubule affinity of KIF1A in its weak-binding ADP state in these different buffers, we  
195 measured the microtubule dwell time in 2 mM ADP and found that the dwell time in BRB12 was  
196 10-fold longer than in BRB80 (Fig. 1F). Thus, the enhanced run length of KIF1A in BRB12 can  
197 be explained by the reduced charge shielding at lower ionic strength enhancing the electrostatic  
198 interaction between the microtubule and KIF1A in the weakly-bound ADP state. Because these  
199 enhanced electrostatic interactions in BRB12 may mask other aspects of KIF1A  
200 mechanochemistry, we focused our efforts on characterizing KIF1A in BRB80, which is closer to  
201 physiological ionic strength.

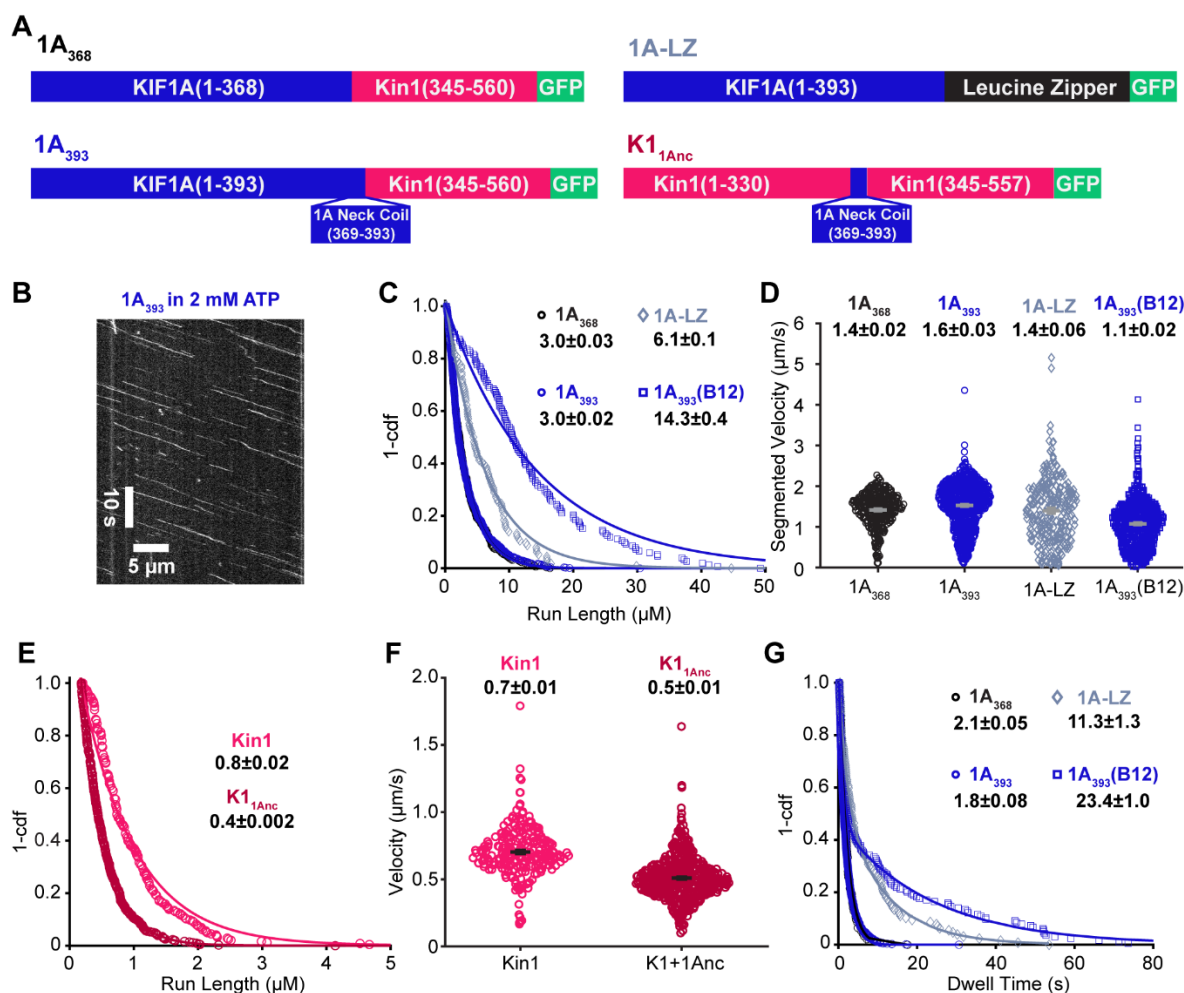

202

203 **Figure 1: Dimerization domain and buffer ionic strength impact KIF1A motility**

204 **A**, Diagrams of the protein constructs used in this study. KIF1A refers to *Rattus norvegicus*

205 KIF1A; Kin1 refers to *Drosophila melanogaster* kinesin heavy chain. **B**, Example kymograph of

206 1A<sub>393</sub> in 2 mM ATP and BRB80. Scale bars are 10 sec and 5 μm. **C**, Run length distribution of

207 1A<sub>368</sub> (black circles), 1A<sub>393</sub> (blue circles), 1A<sub>393</sub>-LZ (navy diamonds), and 1A<sub>393</sub> in BRB12 (blue

208 squares). Single exponential fits give run lengths of  $3.0 \pm 0.03$ ,  $3.0 \pm 0.02$ ,  $6.1 \pm 0.1$ , and  $14.3 \pm$

209  $0.4$  μm, respectively (fit  $\pm$  95% confidence interval). **D**, Velocity distribution of 1A<sub>368</sub> (black

210 circles), 1A<sub>393</sub> (blue circles), 1A<sub>393</sub>-LZ (navy diamonds), and 1A<sub>393</sub> in BRB12 (blue squares).

211 Average segmented velocities are  $1.4 \pm 0.02$ ,  $1.6 \pm 0.03$ ,  $1.4 \pm 0.06$ ,  $1.1 \pm 0.02$  μm/s, respectively

212 (mean  $\pm$  SEM). **E**, Run length distribution of Kin1 (pink) and K1<sub>1Anc</sub> (red). Single exponential fits

213 give run lengths of  $0.8 \pm 0.02$ , and  $0.4 \pm 0.002$  μm, respectively (fit  $\pm$  95% confidence interval).

214 **F**, Velocity distribution of Kin1 (pink) and K1<sub>1Anc</sub> (red). Average velocities are  $0.7 \pm 0.2$  and  $0.5$

215  $\pm 0.2$  μm/s, respectively (mean  $\pm$  SD). **G**, Dwell time distributions in 2 mM ADP. Single



216 exponential fits to 1A<sub>368</sub> (black circles) and 1A<sub>393</sub> (blue circles) give dwell times of  $2.1 \pm 0.05$  and  
217  $1.8 \pm 0.08$  s, respectively. 1A<sub>393</sub>-LZ (navy diamonds) and 1A<sub>393</sub> in BRB12 (blue squares) were fit  
218 with biexponentials. 1A<sub>393</sub>-LZ had dwell times of  $2.0 \pm 0.3$  and  $11.3 \pm 1.3$  s, and 1A<sub>393</sub> in BRB12  
219 had dwell times of  $1.1 \pm 0.04$  and  $23.4 \pm 1.0$  s; the longer duration for each is presented in the  
220 figure.

221

## 222 **K-loop regulates the run length of KIF1A but not Kin-1**

223 Earlier studies of KIF1A monomers found that the positively charged Loop-12 of KIF1A enhances  
224 its microtubule affinity,<sup>23</sup> however subsequent studies of KIF1A dimers have reported Loop-12  
225 does not contribute to superprocessivity.<sup>31</sup> To test whether the K-Loop is responsible for the  
226 superprocessivity of our KIF1A construct in BRB80 buffer, we examined the properties of a  
227 ‘swap’ construct, in which the native loop-12 of KIF1A is removed and replaced with the kinesin-  
228 1 loop-12, KIF1A(1-393)-Kin1Loop12-K560-GFP (referred to as 1A-K1L12; Fig. 2A).<sup>23,31</sup>  
229 Swapping out the KIF1A Loop-12 caused a 6-fold decrease in the run length and a slight decrease  
230 in velocity, consistent with Loop-12 being the determinant of KIF1A superprocessivity (Fig. 2 B-  
231 C and Fig. S3).

232

233 If Loop-12 is enhancing KIF1A processivity by enhancing electrostatic interactions with the  
234 microtubule, then in principle swapping it into kinesin-1 should enhance the run length, and  
235 previous work found this to be the case in low ionic strength buffer.<sup>31</sup> To test this question in  
236 BRB80 buffer where physiological charge shielding is expected, we made a ‘reverse swap’ mutant,  
237 in which the KIF1A loop-12 was inserted into kinesin-1, replacing the native loop-12 (referred to  
238 as K1-1AL12; Fig. 2A). Surprisingly, inserting the positively charged KIF1A K-loop into Kin-1  
239 did not impact the velocity or run length (Fig. 2E-F; see Fig. S3 for representative kymographs).  
240 Thus, due to differences in the microtubule binding interface and/or kinetic tuning of kinesin-1,  
241 adding the positively charged K-loop into kinesin-1 does not enhance its processivity in near  
242 physiological ionic strength buffer.

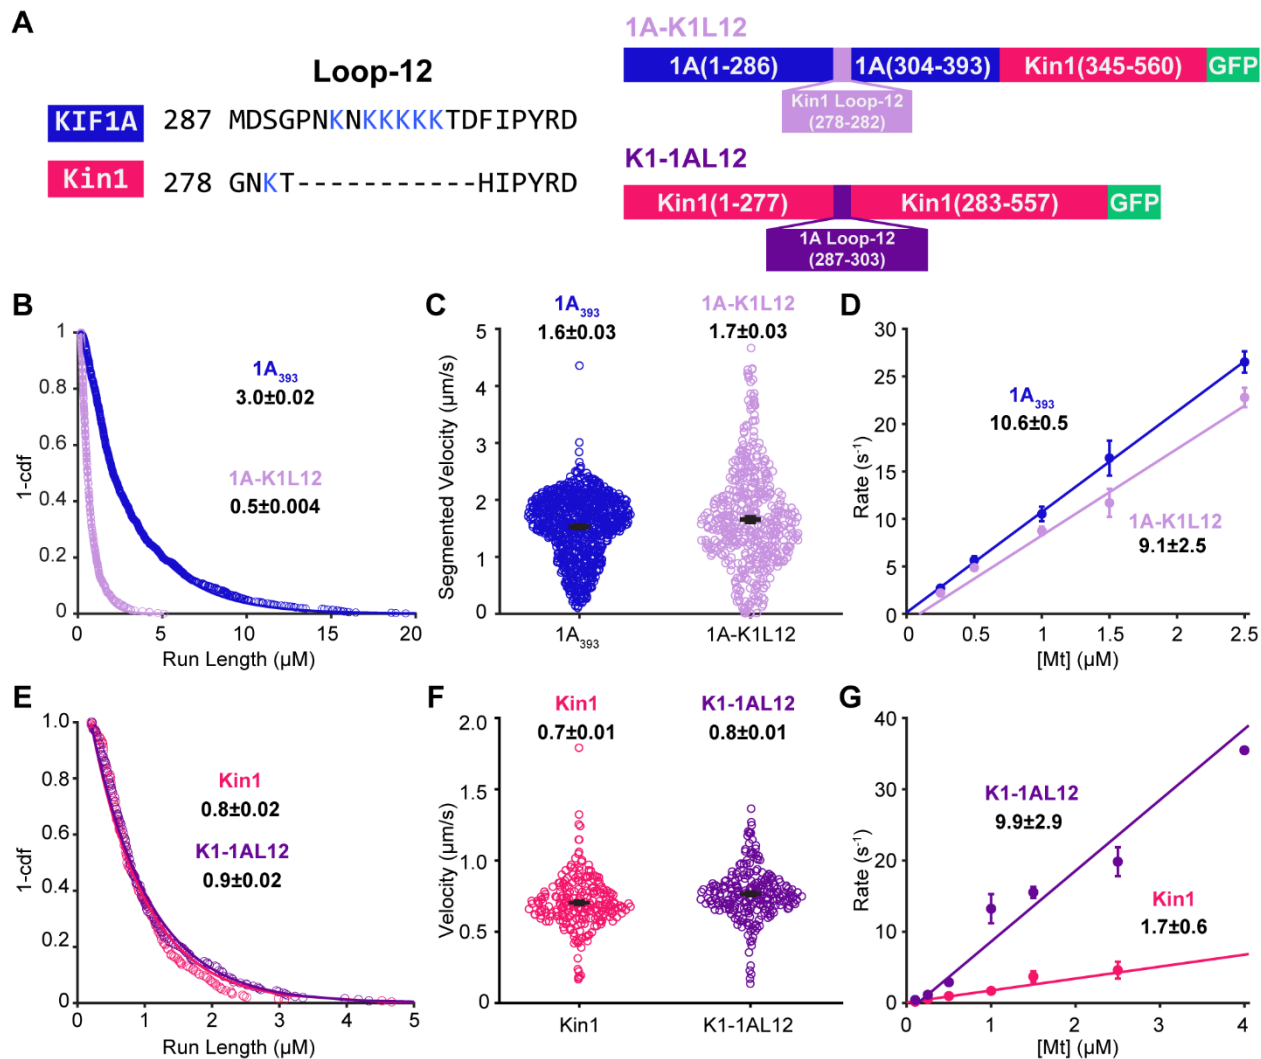

243

244 **Figure 2: K-Loop is the source of KIF1A superprocessivity**

245 **A**, Diagrams of the loop swap constructs. **B**, Run length distribution of 1A<sub>393</sub> (blue circles) and  
 246 1A-K1L12 (light purple circles) in BRB80 and 2 mM ATP. Values are single exponential fit ±  
 247 95% confidence interval. **C**, Velocity distribution of 1A<sub>393</sub> (blue circles) and 1A-K1L12 (light  
 248 purple circles) in BRB80 and 2 mM ATP. Average segmented velocities values are mean ± SEM.  
 249 P<0.0001 **D**, Bimolecular on-rates of 1A<sub>393</sub> (blue circles) and 1A-K1L12 (light purple circles),  
 250 using motors lacking coiled-coil 1 and GFP (see Methods). Linear fits give  $k_{on}^{Mt}$  (fit ± 95%  
 251 confidence interval). Points are mean ± SEM. **E**, Run length distribution of Kin1 (pink circles) and  
 252 K1-1AL12 (dark purple circles) in BRB80 and 2 mM ATP. Values are single exponential fit ±  
 253 95% confidence interval. **F**, Velocity distribution of Kin1 (pink circles) and K1-1AL12 (dark  
 254 purple circles) in BRB80 and 2 mM ATP. Values are mean ± SEM. P<0.0001 **G**, Bimolecular on-

255 rates of Kin1 (pink circles) and K1-1AL12 (dark purple circles). Linear fits give  $k_{\text{on}}^{\text{Mt}}$  (fit  $\pm$  95%  
256 confidence interval). Points are mean  $\pm$  SEM.

257

258 To further investigate how positive charge in loop-12 differentially affects KIF1A and kinesin-1,  
259 we compared the effects of the loop swap on the microtubule on-rate of the two motors. Using  
260 stopped-flow, the bimolecular on-rate ( $k_{\text{on}}^{\text{Mt}}$ ) was measured by incubating the motors with  
261 fluorescently labeled mant-ADP in BRB80 and flushing the solution against varying  
262 concentrations of taxol-stabilized microtubules in 2 mM ADP. Upon mixing, the motors bind to  
263 the microtubule and release the mant-ADP, which results in a fall in fluorescence. Because at low  
264 microtubule concentrations mant-ADP release is rate limited by microtubule binding, a linear fit  
265 of the rates to the microtubule concentration yields the bimolecular on-rate.<sup>15,42,47,48</sup> Notably,  
266 swapping the K-loop out of KIF1A had little effect on the bimolecular on-rate of KIF1A,  
267 contrasting with its effect on the run length (Fig. 2D). However, swapping the KIF1A loop-12 into  
268 kinesin-1 caused a 5-fold increase in the on-rate (Fig. 2G).

269

### 270 **Positive charge in the KIF1A K-loop enhances processivity by decreasing the rate of** 271 **detachment from a vulnerable 1HB state**

272 To investigate the mechanism by which the K-Loop enhances KIF1A processivity, we quantified  
273 key rate constants in the KIF1A chemomechanical cycle that determine motor run length. Previous  
274 work established that kinesin processivity is determined by a kinetic race as the motor takes a  
275 forward step, as follows.<sup>17,18</sup> Following ATP hydrolysis, kinesin is in a vulnerable one-head-bound  
276 state that can resolve either by the tethered head completing a forward step by binding to the next  
277 tubulin binding site and transitioning to a tight binding state, or by the motor dissociating from the  
278 microtubule and terminating the run (Fig. 3A).<sup>15,17</sup> Thus, in principle the K-loop could enhance  
279 KIF1A processivity by some combination of increasing the on-rate that the tethered head binds to  
280 its next binding site ( $k_{\text{on}}^{\text{TH}}$ ) and decreasing the rate that the bound head detaches from the  
281 microtubule ( $k_{\text{detach}}$ ).

282

283 To test whether the K-loop affects the detachment rate of KIF1A from its weak-binding state, we  
284 used an affinity assay in conjunction with a microtubule on-rate measurement. The dissociation

285 constant is defined as  $K_D = \frac{k_{\text{detach}}}{k_{\text{on}}^{\text{Mt}}}$ ; thus, by measuring both  $K_D$  and  $k_{\text{on}}^{\text{Mt}}$  for each motor, we can  
286 calculate  $k_{\text{detach}}$ . To estimate the  $K_D$  of 1A<sub>393</sub> and 1A-K1L12, we carried out a microtubule pelleting  
287 assay in 2 mM ADP to mimic the weak-binding post-hydrolysis state. In this assay, varying  
288 concentrations of microtubules are mixed together with a constant concentration of motors, the  
289 mixture is pelleted, and the GFP fluorescence is used to determine the fraction of motors bound to  
290 the microtubule at each [Mt].<sup>42</sup> As shown in Fig. 3B, swapping out Loop-12 of KIF1A reduced the  
291 microtubule affinity in ADP by four-fold, with  $K_D = 1.3 \pm 0.8 \mu\text{M}$  for 1A<sub>393</sub>, and  $K_D = 5.1 \pm 4.3$   
292  $\mu\text{M}$  for 1A-K1L12. To relate these affinities to the affinity of the motor when it is processively  
293 walking along the microtubule, we repeated these pelleting assays in ATP. For both constructs,  
294 their  $K_D$  in ATP was similar to that in ADP (for 1A<sub>393</sub>,  $K_D = 1.7 \pm 1.0 \mu\text{M}$  in ATP and for 1A-  
295 K1L12,  $K_D = 7.2 \pm 5.1 \mu\text{M}$  in ATP; Fig. 3B), consistent with both motors spending most of their  
296 hydrolysis cycle in a weakly-bound ADP-like state, in agreement with previous work.<sup>15</sup> To  
297 calculate the detachment rate from the weak-binding state, we used the  $K_D$  in ADP together with  
298 the  $k_{\text{on}}^{\text{Mt}}$  results from Fig. 2D, which were  $10.6 \pm 0.5 \mu\text{M}^{-1} \text{s}^{-1}$  for 1A<sub>393</sub> and  $9.1 \pm 2.5 \mu\text{M}^{-1} \text{s}^{-1}$  for  
299 1A-K1L12. From these values, we calculated  $k_{\text{detach}}$  in ADP to be  $18 \pm 11 \text{s}^{-1}$  for 1A<sub>393</sub> and  $66 \pm$   
300  $50 \text{s}^{-1}$  for 1A-K1L12, matching the 4-fold difference in the run lengths in Fig. 2B.

301  
302 To more directly test whether the K-loop slows dissociation of KIF1A from the microtubule in the  
303 weakly-bound post-hydrolysis state, we used single-molecule TIRF microscopy to measure the  
304 dwell time of landing events in 2 mM ADP. For 1A<sub>393</sub>, the dwell time distribution was well fit by  
305 a single-exponential with a time constant of  $1.8 \pm 0.08 \text{s}$  (Fig. 1F), corresponding to an off-rate of  
306  $0.56 \pm 0.02 \text{s}^{-1}$ . When we repeated the experiment for 1A-K1L12, the kymographs showed a  
307 population of very transient events along with a population of longer duration events (Fig. S3).  
308 The dwell time distribution was well fit to a double exponential with a fast population of  $0.03 \pm$   
309  $0.01 \text{s}$  ( $k_{\text{off}} = 33 \text{s}^{-1}$ ) that constituted ~40% of the events, and a slow population of  $0.3 \pm 0.03 \text{s}$  ( $k_{\text{off}}$   
310  $= 3.3 \text{s}^{-1}$ ) that constituted the other ~60 % of the events (Fig. 3C). Relative to the 1A<sub>393</sub> dwell time  
311 of 1.8 s, these 1A-K1L12 dwell times correspond to a 60- and 6-fold faster off-rate when the K-  
312 loop of KIF1A is swapped out. Thus, both the microtubule pelleting assay and the single-molecule  
313 dwell time assay find that the apparent off-rate of KIF1A in the weakly-bound ADP state is  
314 increased when the K-loop is replaced by the equivalent sequence from kinesin-1.

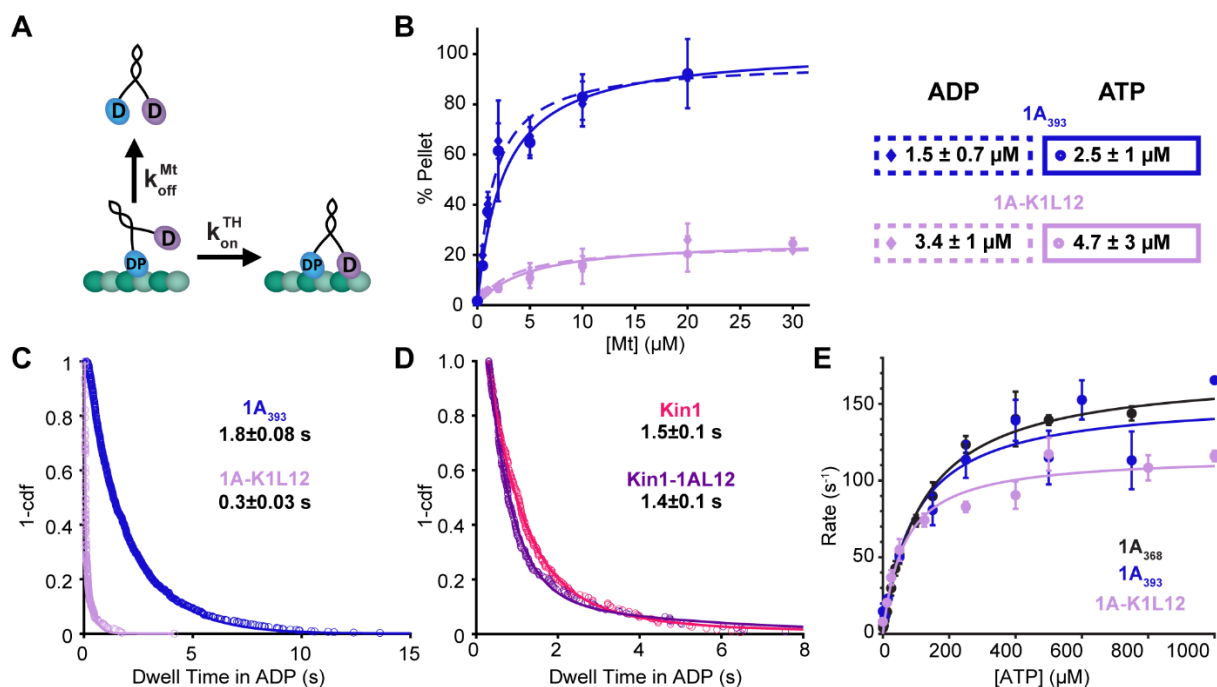

315  
 316 **Figure 3: K-Loop regulates KIF1A superprocessivity via detachment rate in the kinetic race**  
 317 **A**, Diagram of transitions involved in the Kinetic Race, the tethered-head attachment rate  $k_{on}^{TH}$  and  
 318 the microtubule detachment rate  $k_{detach}$ . D, ADP; DP, ADP+Pi. **B**, Microtubule pelleting assay of  
 319 1A<sub>393</sub> and 1A-K1L12 in 2 mM ADP or ATP and BRB80. Plot is the percent of GFP-labelled  
 320 motors in the microtubule pellet after centrifugation as a function of microtubule concentration.  
 321 To account for any inactive motors, data are normalized to the concentration of motors bound in 1  
 322 mM AMPPNP, which induces a strongly-bound state of the motor. Fits with a Langmuir binding  
 323 isotherm give the  $K_D$  and maximal binding fraction for each condition. 1A<sub>393</sub> gives a  $V_{max}$  of  $97 \pm$   
 324  $10 \%$  and  $102 \pm 20 \%$  in ADP and ATP, respectively. Despite the normalization to percent binding  
 325 in AMPPNP, 1A-K1L12 does not reach full binding in this microtubule range with a  $V_{max}$  of  $24 \pm$   
 326  $3 \%$  and  $26 \pm 7 \%$  in ADP and ATP, respectively. This could be because the  $K_D$  is actually around  
 327  $30 \mu\text{M}$  or there is only  $\sim 50\%$  maximal binding in ADP and ATP. Values are fit  $\pm 95\%$  CI and error  
 328 bars are mean  $\pm$  relative error. **C**, Dwell time distribution of 1A-K1L12 (light purple circles) in 2  
 329 mM ADP and BRB80. Biexponential fit gives dwell times of  $0.03 \pm 0.01 \text{ s}$  and  $0.3 \pm 0.03 \text{ s}$  (fit  $\pm$   
 330  $95\%$  confidence interval) with equal weights for the fast and slow populations. Data were collected  
 331 at 50 frames per second. **D**, Dwell time distribution of Kin1 (pink circles) and K1-1AL12 (dark  
 332 purple circles) in 2 mM ADP and BRB80. Values are single exponential fit  $\pm 95\%$  confidence  
 333 interval. **E**, ATP-triggered Half-Site Release assay of 1A<sub>368</sub> (black circles), 1A<sub>393</sub> (blue circles),

334 and 1A-K1L12 (light purple circles). Plot is the observed rate as a function of ATP concentration,  
335 and fitting with Michaelis-Menten equation give  $K_M$  and  $k_{max}$  values for each condition. For 1A<sub>368</sub>  
336 (black circles), 1A<sub>393</sub> (blue circles), and 1A-K1L12 (light purple circles),  $k_{max}$  were  $172 \pm 10$ ,  $154$   
337  $\pm 30$ , and  $116 \pm 13 \text{ s}^{-1}$ , respectively;  $K_M$  were  $119 \pm 20$ ,  $96 \pm 53$ , and  $64 \pm 28 \text{ }\mu\text{M}$ , respectively (fit  
338  $\pm 95\%$  confidence interval).

339  
340 As described by the kinetic race shown in Fig. 3A, it is also possible that the K-loop contributes  
341 to KIF1A processivity by enhancing the rate that the tethered head attaches to the microtubule  
342 during a forward step. To test this possibility, we carried out an ATP-triggered Half-Site Release  
343 assay, as follows (Fig. 3E).<sup>49,50</sup> First, we incubated the motors with mant-ADP and microtubules  
344 to establish a complex of motors bound to the microtubule in a one-head-bound state, with mant-  
345 ADP trapped in the tethered-head. Then, we flushed this solution against varying concentrations  
346 of unlabeled ATP to initiate the binding of the tethered head and subsequent mant-ADP release.  
347 We next fit the fluorescent delay from the release of mant-ADP with an exponential function at  
348 each ATP concentration, plotted the observed rates versus the corresponding [ATP], and fit the  
349 data to a Michaelis-Menten curve. The observed rate constant at saturating ATP concentrations,  
350  $k_{max}$ , represents ATP hydrolysis, tethered head binding, and the subsequent release of mant-ADP.  
351 Because hydrolysis and mant-ADP are thought to be fast,<sup>15</sup>  $k_{max}$  serves as a proxy for the tethered  
352 head binding rate. The  $k_{max}$  for our 1A<sub>393</sub> construct ( $154 \pm 30 \text{ s}^{-1}$ ; fit  $\pm 95\%$  confidence interval)  
353 was similar to 1A<sub>368</sub> ( $172 \pm 10 \text{ s}^{-1}$ ), indicating that the neck-coil does not alter the tethered head  
354 on-rate. For 1A-K1L12,  $k_{max}$  decreased slightly to  $116 \pm 13 \text{ s}^{-1}$ , indicating that, in addition to  
355 slowing the microtubule off-rate, the K-loop may enhance KIF1A superprocessivity by increasing  
356 the tethered head on-rate,  $k_{on}^{TH}$ . However, a caveat of this conclusion is that because the tethered-  
357 head attachment is thought to be the rate limiting step of the KIF1A chemomechanical cycle,<sup>15</sup> a  
358 decrease in this rate should also decrease the overall motor velocity. Instead, the velocity for 1A-  
359 K1L12 was 20% faster than the 1A<sub>393</sub> (Fig. 2C). Additionally, the calculated  $k_{on}^{TH}$  for 1A-K1L12  
360 of  $116 \pm 13 \text{ s}^{-1}$  is slower than the overall stepping rate of  $212 \text{ s}^{-1}$  (calculated as  $1.7 \text{ }\mu\text{m/s}$  velocity  
361  $\div 8$  per step). Thus, the question of whether the K-loop enhances the tethered-head on-rate is  
362 inconclusive from this experiment.

363

364 As a second strategy for estimating the tethered head attachment rate, we calculated it based on  
365 the observed run length in ATP and the measured detachment rate in ADP, as follows. From the  
366 kinetic race shown in Fig. 3A,<sup>17</sup> the probability of detaching during each cycle is:

$$P_{\text{detach}} = \frac{k_{\text{detach}}^{\text{ADP}}}{k_{\text{on}}^{\text{TH}} + k_{\text{detach}}^{\text{ADP}}} \approx \frac{k_{\text{detach}}^{\text{ADP}}}{k_{\text{on}}^{\text{TH}}} \quad \text{Eq. 1}$$

367 The number of steps a motor takes before dissociating can be estimated as the inverse of the  
368 detachment probability:

$$RL_{\text{steps}} = \frac{1}{P_{\text{detach}}} \approx \frac{k_{\text{on}}^{\text{TH}}}{k_{\text{detach}}^{\text{ADP}}} \quad \text{Eq. 2}$$

369 Thus, the tethered head attachment rate can be estimated by multiplying the measured detachment  
370 rate in ADP by the measured run length in ATP:

$$k_{\text{on}}^{\text{TH}} = k_{\text{detach}}^{\text{ADP}} * RL_{\text{steps}} \quad \text{Eq. 3}$$

371 Table 1 shows the off-rates in ADP calculated from measured dwell times in Fig. 3 C and D, along  
372 with the run lengths calculated in number of steps from Fig. 2 B and E, and the resulting calculated  
373 tethered head attachment rate. The first result is that the calculated tethered head on-rates are  
374 roughly three-fold faster for KIF1A than kinesin-1, consistent with the faster stepping rate of  
375 KIF1A. The key result from this analysis is that for KIF1A, swapping out the K-loop has no effect  
376 on the calculated tethered-head on-rate. In summary, the K-loop contributes to the  
377 superprocessivity of KIF1A by slowing the off-rate of the motor from the vulnerable 1HB state,  
378 and the K-loop does not modulate the processivity of KIF1A by enhancing the tethered head  
379 attachment rate.

380

381

382 **Table 1:** Calculations of Tethered-head attachment rate for different constructs.

383 Dwell times are fit  $\pm$  95% CI from Fig. 3 and off-rates are inverse of dwell times with propagated  
384 errors. Run Length (RL) in steps are the RL taken from Fig. 2 divided by the step size (8-nm), and  
385 errors are  $\pm$  95% CI.  $k_{\text{on}}^{\text{TH}}$  were calculated using Eq. 3, with errors propagated from off-rates and  
386 RL.

| Construct               | Dwell Time (s) | Off-rate ( $\text{s}^{-1}$ ) | RL in steps (RL/8 nm) | Calc. $k_{\text{on}}^{\text{TH}}$ ( $\text{s}^{-1}$ ) |
|-------------------------|----------------|------------------------------|-----------------------|-------------------------------------------------------|
| <b>1A<sub>393</sub></b> | 1.8 $\pm$ 0.08 | 0.56 $\pm$ 0.02              | 375 $\pm$ 3           | 208 $\pm$ 8                                           |
| <b>1A-K1L12</b>         | 0.3 $\pm$ 0.03 | 3.3 $\pm$ 0.3                | 63 $\pm$ 1            | 208 $\pm$ 19                                          |
| <b>Kin1</b>             | 1.5 $\pm$ 0.1  | 0.67 $\pm$ 0.04              | 100 $\pm$ 3           | 67 $\pm$ 5                                            |
| <b>K1-1AL12</b>         | 1.4 $\pm$ 0.1  | 0.71 $\pm$ 0.05              | 113 $\pm$ 3           | 80 $\pm$ 6                                            |

387

### 388 **KIF1A run length scales with charge of the K-loop**

389 In principle, swapping in the K-loop of kinesin-1 could be reducing the KIF1A run length either  
390 solely due to differences in positive charge, or through some combination of charge and the length  
391 of the loop. To test whether the run length data can be accounted for exclusively based on the  
392 charge of loop-12, we designed three additional loop-12 mutant constructs having the same length  
393 as wild type but having varying net charge in the loop-12 domain. First, we increased the total  
394 charge of loop-12 in our 1A<sub>393</sub> construct by replacing three of the native uncharged residues with  
395 lysines, resulting in a net charge of +7 in loop-12; we refer to this construct as SuperK (Fig. 4A).  
396 Using single-molecule motility assays in BRB80 at 2 mM ATP, we found that the run length of  
397 SuperK was  $\sim$ 2-fold longer and the segmented velocity was slightly slower compared to the control  
398 1A<sub>393</sub> (Fig. 4B-C; Table 2). We also used stopped-flow to measure the bimolecular on-rate,  $k_{\text{on}}^{\text{Mt}}$ ,  
399 and found that the SuperK on-rate was 1.5-fold faster than 1A<sub>393</sub>, but the values were within fit  
400 error of one another (Fig. 4D).

401

402 Next, to test whether reducing the net charge of loop-12 reduces the run length, we replaced a  
403 portion of the of the lysine residues in loop-12 with glutamines. Glutamine was chosen because it  
404 is uncharged in our buffer (pH 6.9) and the side chain is of similar size to lysine, minimizing  
405 potential steric effects. We substituted four or five lysines in 1A<sub>393</sub> by glutamines, creating 4Q and  
406 5Q, which had net charges in Loop-12 of 0 and -1, respectively (Fig. 4A). In BRB80 buffer, we



407 observed no processive events for 4Q or 5Q (Fig. 4A; ND, not detected). Thus, although swapping  
408 in the kinesin-1 K-loop (K1L12; +1 net charge) led to short but detectable processivity, reducing  
409 the net charge of the K-loop further led to undetectable processivity in BRB80 buffer.

410

411 Because lowering the ionic strength enhanced the run length of other KIF1A constructs, we tested  
412 the processivity of these K-loop charge mutants in BRB12 buffer and found that they had  
413 measurable run lengths under these conditions (see representative kymographs in Fig. S4). This  
414 result confirms that the lack of events in BRB80 was not due to protein misfolding or other off-  
415 target effects. In BRB12, the run lengths of 4Q and 5Q scaled with the net charge of loop-12, as  
416 follows (Fig. 4E). Wild-type 1A<sub>393</sub> (+4 charge) had a run length  $14 \pm 0.4 \mu\text{m}$ ; K1L12 (+1 charge)  
417 had a run length of  $6.7 \pm 0.1 \mu\text{m}$ ; 4Q (neutral) had a run length of  $2.6 \pm 0.1 \mu\text{m}$ ; and 5Q (-1 net  
418 charge) had a run length of  $1.2 \pm 0.1 \mu\text{m}$  (see also Fig. 6 and Table 3). The velocities in BRB12  
419 also differed, but not in a charge-dependent manner (Fig. 4F; Table 3). Interestingly the  
420 bimolecular on-rates of the three mutants in BRB12 buffer were similar to one another and they  
421 were all ~5-fold slower than 1A<sub>393</sub> (Fig. 4G). Thus, the key feature of KIF1A loop-12 that enhances  
422 the motor's processivity is the positive charge rather than the longer length of the loop relative to  
423 kinesin-1.

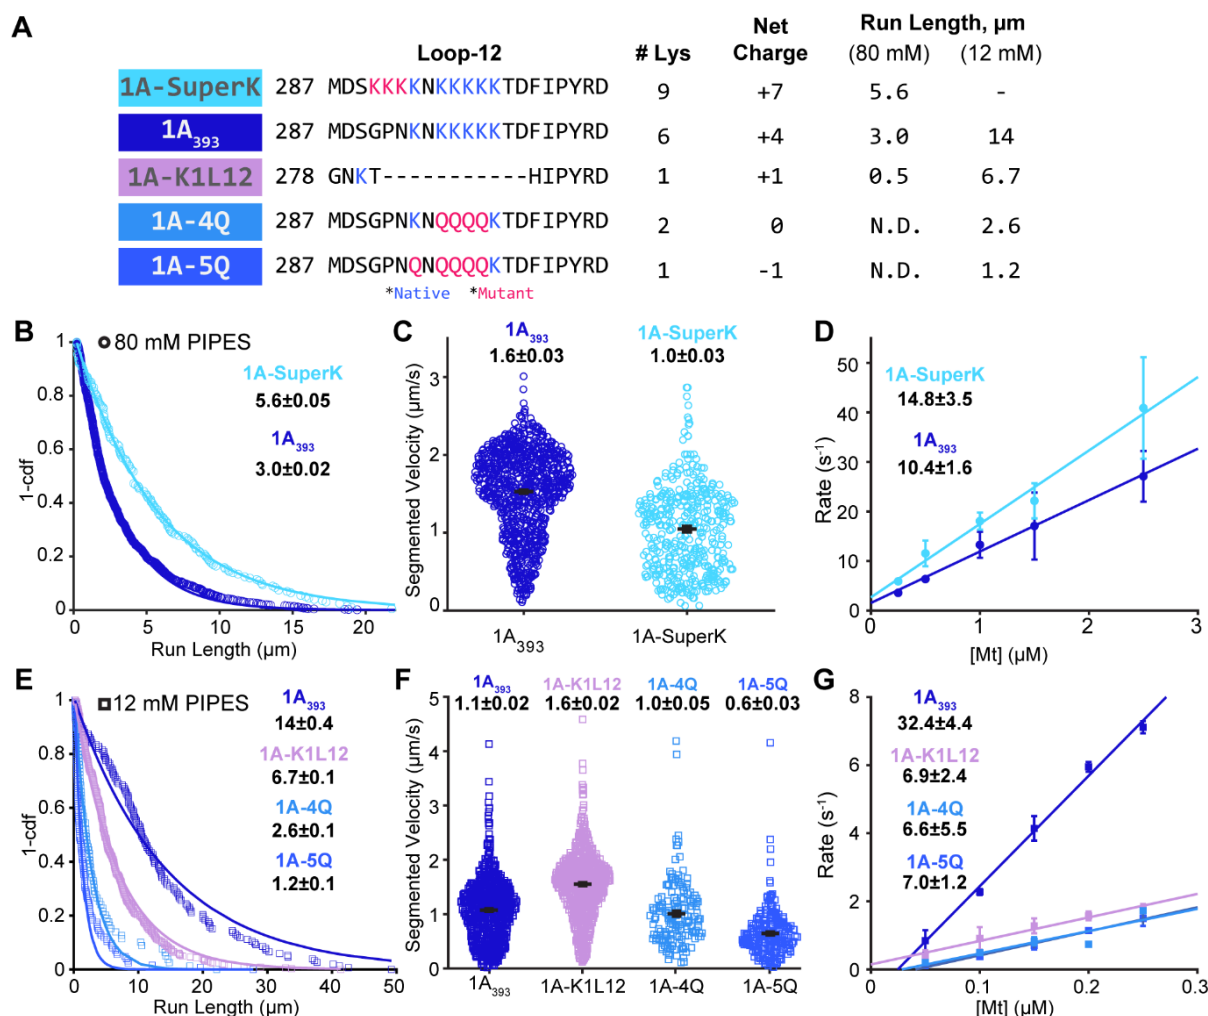

424

425 **Figure 4: Charge of the KIF1A K-Loop regulates superprocessivity**

426 **A**, Sequence of the Loop-12 domain in the protein constructs used, along with the number of lysine  
 427 residues and net charge of the domain. Mutations are in red; native lysines are in green. ND  
 428 indicates not detectable run length. Representative kymographs in Fig. S4. **B**, Run length  
 429 distribution of 1A<sub>393</sub> (blue circles) and 1A-SuperK (light blue circles) in BRB80 buffer and 2 mM  
 430 ATP. Values are single exponential fits  $\pm$  95% confidence interval. **C**, Velocity distribution of  
 431 1A<sub>393</sub> (blue circles) and 1A-SuperK (light blue circles) in BRB80 and 2 mM ATP. Average  
 432 velocities for segments with  $\Delta x > 3$  pixels are mean  $\pm$  SEM. **D**, Bimolecular on-rates of 1A<sub>393</sub> (blue  
 433 circles) and 1A-SuperK (light blue circles) in BRB80. Linear fits, reported as fit  $\pm$  95% confidence  
 434 interval, give  $k_{\text{on}}^{\text{Mt}}$ . Points are mean  $\pm$  SEM. **E**, Run length distribution of 1A<sub>393</sub> (blue squares), 1A-  
 435 4Q (light blue squares), 5Q (medium blue squares) and 1A-K1L12 (light purple squares) in BRB12  
 436 buffer and 2 mM ATP. Values are single exponential fit  $\pm$  95% confidence interval. **F**, Velocity

437 distribution of 1A<sub>393</sub> (blue squares), 1A-K1L12 (light purple squares), 1A-4Q (light blue squares),  
438 and 1A-5Q (medium blue squares) in BRB12 and 2 mM ATP. Average velocities for segments  
439 with  $\Delta x > 3$  pixels are reported as mean  $\pm$  SEM. **G**, Bimolecular on-rates of 1A<sub>393</sub> (blue squares),  
440 1A-4Q (light blue squares), 1A-5Q (medium blue squares) and 1A-K1L12 (light purple squares)  
441 in BRB12 buffer. Linear fits give  $k_{\text{on}}^{\text{Mt}}$  (fit  $\pm$  95% confidence interval). Points are mean  $\pm$  SEM.

442

### 443 **Human disease mutations adjacent to the K-loop impair KIF1A motility**

444 To extend our understanding of the role of loop-12 in KIF1A motility, we investigated the motile  
445 properties of a set of mutations identified in patients suffering from KIF1A Associated  
446 Neurological Disorder (KAND). A recent study investigated the clinical features of 117 KAND  
447 patients and identified a number of mutations in the well conserved ‘PYRD’ sequence at the  
448 carboxyl end of loop-12; no patients in the study had mutations in the K-loop proper.<sup>14</sup> We  
449 investigated, three pathogenic human mutations: R307P, R307Q, and P305L (Fig. 5A). The four  
450 patients harboring the R307Q mutation had moderate to severe KAND with hypertonia/spasticity,  
451 and the pair of twins that harbored the R307P mutation displayed brain atrophy and seizures.<sup>13,14</sup>  
452 In *C. elegans*, R307Q was able to partially rescue a null mutant;<sup>51</sup> however, to our knowledge the  
453 single-molecule properties of R307Q and R307P have not been evaluated. The four patients  
454 harboring the P305L mutation ranged from mild to severe KAND; all showed  
455 hypertonia/spasticity, but only two of four showed brain atrophy and one of the four exhibited  
456 seizures. In contrast to R307Q, P305L was unable to rescue a *C. elegans* null mutant; however,  
457 P305L was shown to be motile in single-molecule assays albeit with impaired performance.<sup>52</sup> Thus  
458 the P307 mutants, which decrease positive charge near the K-loop, present more severe clinical  
459 phenotypes, but the P307Q can partially rescue worms. In contrast, P305L, which has been  
460 proposed to alter the conformation of a helix adjacent to the K-loop, has a less severe clinical  
461 phenotype and the motor retains some motility, but is unable to rescue mutant worms.<sup>52</sup>

462

463 We first examined R307P, R307Q, and P305L mutants using single-molecule tracking in BRB80  
464 and 2 mM ATP, and observed no motility for any of the three disease mutants (Fig. 5B). When the  
465 ionic strength was lowered using BRB12 buffer, R307P and R307Q showed a higher frequency of  
466 landing events and longer duration of diffusive events, but still no persistent directional movement

467 (Fig. 5B). In contrast, P305L did show processive movement in BRB12, but with a ~5-fold shorter  
 468 run length and ~2-fold slower velocity than the 1A<sub>393</sub> control in BRB12 (Fig. 5C-D). A previous  
 469 study found that that the P305L mutation strongly reduced the microtubule landing rate, and  
 470 suggested that the mutation alters the interaction of the K-Loop with the C-terminal tail of  
 471 tubulin.<sup>52</sup> To directly measure the microtubule on-rate of P305L, we used the stopped flow  $k_{on}^{Mt}$   
 472 assay in BRB12 and found that the P305L mutant had a ~3-fold lower on-rate than 1A<sub>393</sub> (Fig. 5E).  
 473 Interestingly, the P305L on-rate of  $9.3 \pm 3 \mu M^{-1}s^{-1}$  (Fig. 5E) was faster than either the loop swap  
 474 mutant 1A-K1L12 or the two glutamine mutants in BRB12 (Fig. 4G; Table 3). This ~3-fold  
 475 decrease in the on-rate was in the same direction, but it was much smaller than the ~35-fold  
 476 decrease in the microtubule landing rate of P305L in previous work.<sup>52</sup>

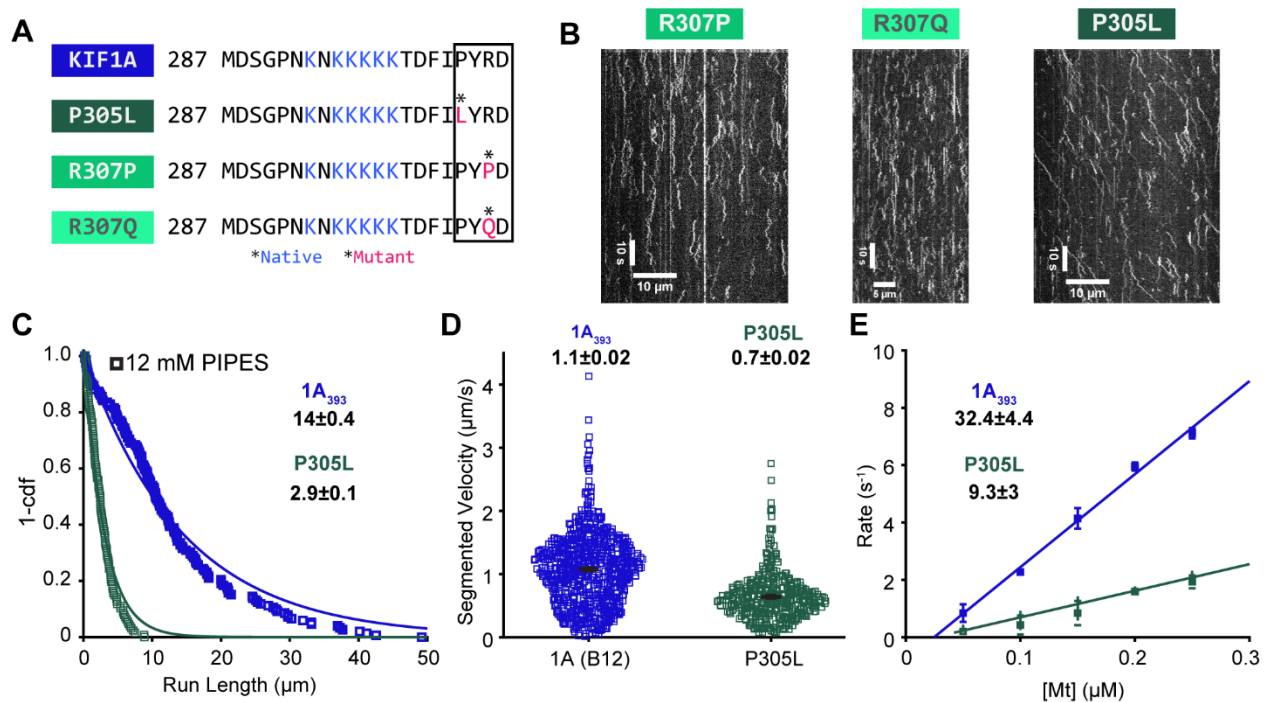

477

478 **Figure 5: Pathogenic mutations in Loop-12 hinder KIF1A motility**

479 **A**, Sequence of the Loop-12 for wild type and mutants, with point mutations indicated in red and  
 480 conserved distal region indicated by a box. **B**, Example kymographs of R307P, R307Q, and P305L  
 481 in BRB12 buffer and 2 mM ATP. **C**, Run length distribution of 1A<sub>393</sub> (blue squares) and P305L  
 482 (green squares) in BRB12 and 2 mM ATP. Values are single exponential fit ± 95% confidence  
 483 interval. **D**, Velocity distribution of 1A<sub>393</sub> (blue squares) and P305L (green squares) in BRB12 and  
 484 2 mM ATP. Average velocities for segments with  $\Delta x > 3$  pixels are mean ± SEM. **E**, Bimolecular

485 on-rates of 1A<sub>393</sub> (blue squares) and P305L (green squares) in BRB12. Linear fits give  $k_{on}^{Mt}$  (fit  $\pm$   
 486 95% confidence interval). Points are mean  $\pm$  SEM.

487 **Table 2:** Summary of data in BRB80 buffer.

| Construct        | RL ( $\mu\text{m}$ ) | Vel ( $\mu\text{m/s}$ ) | ADP Dwell (s)  | $k_{on}^{Mt}$ ( $\mu\text{M}^{-1} \text{s}^{-1}$ ) |
|------------------|----------------------|-------------------------|----------------|----------------------------------------------------|
| <b>1A(1-393)</b> | 3.0 $\pm$ 0.02       | 1.6 $\pm$ 0.03 *        | 1.8 $\pm$ 0.08 | 10.6 $\pm$ 0.5                                     |
| <b>1A-K1L12</b>  | 0.5 $\pm$ 0.004      | 1.7 $\pm$ 0.03          | 0.3 $\pm$ 0.03 | 9.1 $\pm$ 2.5                                      |
| <b>K1</b>        | 0.8 $\pm$ 0.02       | 0.7 $\pm$ 0.01          | 1.5 $\pm$ 0.1  | 1.7 $\pm$ 0.6                                      |
| <b>K1-1AL12</b>  | 0.9 $\pm$ 0.02       | 0.8 $\pm$ 0.01          | 1.4 $\pm$ 0.1  | 9.9 $\pm$ 2.9                                      |
| <b>Super-K</b>   | 5.6 $\pm$ 0.05       | 1.0 $\pm$ 0.03 *        | -              | 14.8 $\pm$ 3.5                                     |

488 \*Segmented Velocity reported.

489

490 **Table 3:** Summary of Data in BRB12 buffer.

| Construct        | RL ( $\mu\text{m}$ ) | Vel ( $\mu\text{m/s}$ ) | $k_{on}^{Mt}$ ( $\mu\text{M}^{-1} \text{s}^{-1}$ ) |
|------------------|----------------------|-------------------------|----------------------------------------------------|
| <b>1A(1-393)</b> | 14.3 $\pm$ 0.4       | 1.1 $\pm$ 0.02 *        | 32 $\pm$ 4.4                                       |
| <b>1A-K1L12</b>  | 6.7 $\pm$ 0.1        | 1.6 $\pm$ 0.02 *        | 6.9 $\pm$ 2.4                                      |
| <b>4Q</b>        | 2.6 $\pm$ 0.1        | 1.0 $\pm$ 0.05 *        | 6.6 $\pm$ 5.5                                      |
| <b>5Q</b>        | 1.2 $\pm$ 0.1        | 0.6 $\pm$ 0.03 *        | 7.0 $\pm$ 1.2                                      |
| <b>P305L</b>     | 2.9 $\pm$ 0.1        | 0.7 $\pm$ 0.02 *        | 9.3 $\pm$ 3                                        |

491 \*Segmented Velocity reported.

492

## 493 Discussion

494 The positively charged loop-12 in kinesin-3 motors, known as the K-Loop, has been a topic of  
 495 interest in the field for many years, but there has yet to be a consensus on the role of the K-loop in  
 496 the mechanism of KIF1A superprocessivity. In this work, we have established a comprehensive  
 497 understanding of the mechanism of the K-Loop in the KIF1A chemomechanical cycle. We  
 498 conclude that the unique superprocessivity of KIF1A dimers originates from the charge-dependent  
 499 interaction of loop-12 with the microtubule, resulting in a reduction in off-rate from the post-  
 500 hydrolysis one-head-bound (1HB) state (Fig. 6). This stabilization of the weak-binding state allows  
 501 time for the tethered head to bind to the next binding site and complete the step, and thus  
 502 maximizes the number of steps the motor takes before terminating a processive run.

503

504 Despite an appreciation of the importance of the K-loop, there are contradictions in the literature  
505 regarding the role of the K-loop in KIF1A superprocessivity. Early work made the striking finding  
506 that KIF1A monomer constructs move processively through a combination of intermittent forward  
507 steps and 1D diffusion along the microtubule.<sup>25,53</sup> The microtubule affinity of these monomers was  
508 shown to depend on the negatively charged C-terminal tail of tubulin, scale with the amount of  
509 positive charge in loop-12, and be enhanced in low ionic strength buffers. Subsequently, it was  
510 shown that full-length KIF1A is dimeric and the motility of dimer constructs was fast,  
511 superprocessive, and lacked the diffusional behavior of the monomers.<sup>30,54</sup> However, using a  
512 KIF1A dimer truncated after the neck-coil (1-393 aa), it was found that replacing the KIF1A loop-  
513 12 with that of kinesin-1 did not diminish the run length,<sup>31</sup> a result that was puzzling in light of the  
514 monomer results. Subsequent work showed that, unlike kinesin-1, the neck-coil domain of KIF1A  
515 is insufficient to stably dimerize the motor, and stabilized dimers could be created by adding a  
516 leucine zipper sequence downstream of the neck-coil.<sup>19,27,30,32</sup> Upon closer inspection, the apparent  
517 lack of influence of loop-12 on KIF1A processivity can be explained by the fact that the construct  
518 used in that work (KIF1A(1-393)) lacked a distal coiled-coil region that is needed to stabilize the  
519 dimer.<sup>31</sup> In that work, KIF1A(1-393) had a run length of 2.6  $\mu\text{m}$ , the loop-swap mutant had a run  
520 length of 3.6  $\mu\text{m}$ , and the stably dimerized KIF1A(1-393)-LZ had a run length of 9.8  $\mu\text{m}$ .<sup>31,32</sup> Thus,  
521 the apparent lack of influence of the K-loop in the truncated dimer lacking a stabilizing LZ domain  
522 can be explained by run lengths being terminated by the motor reverting to monomers and  
523 dissociating from the microtubule rather than termination of a processive run by normal  
524 dissociation of the dimer. As a competing process, this premature termination would mask any  
525 change in run length due to the loop swap.

526  
527 By measuring key transitions in the kinetic race that defines processivity, we find that the principal  
528 role of the K-loop is to stabilize the weak-binding, post-hydrolysis state of KIF1A. The finding  
529 from the pelleting assay that the  $K_D$  for microtubules is similar in ADP and ATP for both wild-  
530 type and Loop-12 swapped KIF1A emphasizes the importance of the weak binding state for KIF1A  
531 processivity. Their similar residence times are consistent with KIF1A spending the majority of its  
532 cycle in a vulnerable one-head-bound ADP state, a key finding from a previous study.<sup>15</sup> The  
533 parallel reduction of the microtubule affinity in ADP and ATP upon swapping out the K-loop  
534 clearly demonstrates how decreasing the microtubule affinity in the ADP state dictates a reduction

535 in run length. Because the other component of the kinetic race, tethered head attachment, also  
536 involves microtubule binding and hence might be expected to be modulated by charge in the K-  
537 loop, it was notable that swapping out the K-loop did not alter the tethered head on-rate. Tethered  
538 head binding involves both a mechanical component of the tethered head stretching to the next  
539 binding site, as well as a biochemical component of ADP release to achieve tight binding, and so  
540 the simplest interpretation of this result is that the tethered head binding rate is not substantially  
541 mediated by electrostatic interactions between the motor domain and the microtubule.  
542 Surprisingly, we found that swapping out the K-loop of KIF1A did not diminish the bimolecular  
543 on-rate in solution, meaning that electrostatics mediated by the K-loop do not play a strong role in  
544 the initial landing of KIF1A on the microtubule at near physiological ionic strength. This behavior  
545 contrasts with kinesin-1, where inserting the K-loop of KIF1A did enhance the bimolecular on-  
546 rate in solution, a difference that highlights the different kinetic tuning of the two motor families  
547 involved in the initial binding of the motor to the microtubule.

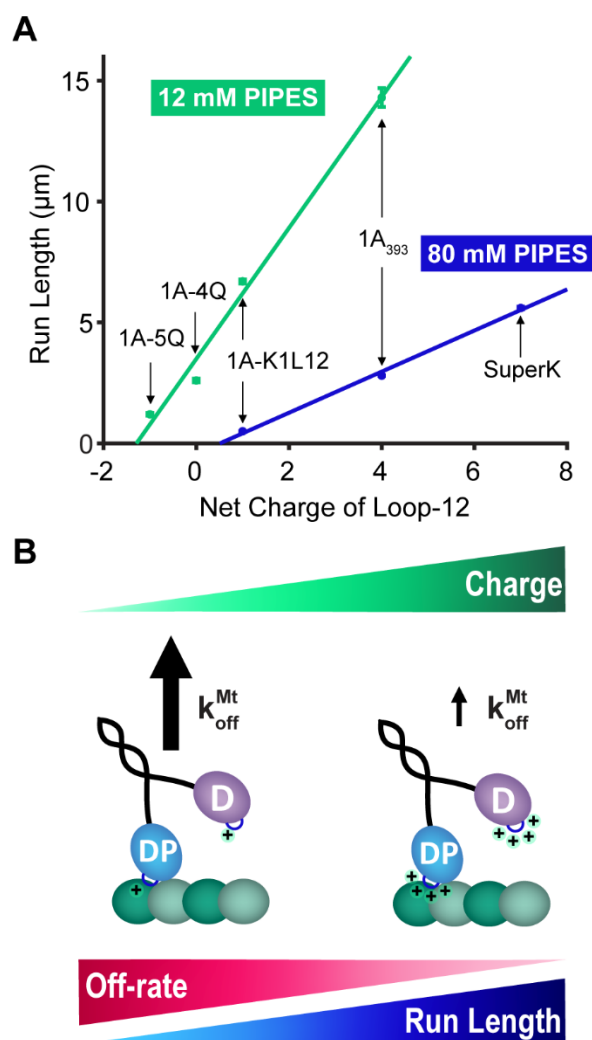

548

549 **Figure 6: Run Length of KIF1A is dependent on Charge of Loop-12**

550 **A**, Run Length of the various processive constructs used in this study, plotted as a function of the  
 551 net charge of their Loop-12 domain, in BRB12 and BRB80. Points are from the 1-CDF plots in  
 552 previous figures (fit  $\pm$  95% CI). Linear fits to the points in BRB12 and BRB80 give slopes of  $2.7$   
 553  $\pm 0.9$  and  $0.9 \pm 0.6$ , respectively (fit  $\pm$  95% CI). **B**, Diagram depicting how increasing positive  
 554 charge in Loop-12 leads to a slower off-rate in ADP that results in longer run lengths.

555

556 By systematically replacing lysines in KIF1A loop-12 with glutamines, we find that the run length  
 557 of KIF1A scales linearly with the net charge of loop-12 in both BRB80 and BRB12 (Fig. 6). Three  
 558 published studies using KIF1A or the *C. elegans* ortholog Unc104 in BRB12 buffer found similarly  
 559 that reducing the charge of the K-loop by either swapping with the kinesin-1 sequence or replacing  
 560 lysines with alanines decreased the run length.<sup>27,30,31</sup> Arpag *et. al.* found that swapping the KIF1A



561 K-loop (net charge +4) with the rat kinesin-1 sequence (net charge +1) caused a 2.2-fold reduction  
562 in run length, and Lessard found a 2.6-fold reduction in run length when the net charge of the K-  
563 loop was reduced from +4 to +1 by replacing three lysines in the K-loop with alanines.<sup>27</sup> These  
564 values are similar to the 2.1-fold reduction in run length we measured between 1A393 (net charge  
565 +4) and 1AK1L12 (net charge +1) (Fig. 6A). Using the *C. elegans* KIF1A ortholog Unc104,  
566 Tomishige found that swapping the K-loop (net charge +4) with the human kinesin-1 sequence  
567 (net charge 0) resulted in a 5.4-fold reduction in run length, which matches our 5.5-fold shorter  
568 run length for K1-4Q (net charge 0). The similarity across these studies (shown graphically in Fig.  
569 S5) reinforces our finding that KIF1A processivity scales linearly with the charge of the K-loop,  
570 and also argues that this reduction does not depend on the specific sequences, but solely due to the  
571 electrostatic charge. This linear relationship and x-intercept around a -1 charge also helps to  
572 explain why a construct in which all six lysines in the K-loop were replaced with alanines, resulting  
573 in a net charge of -2, was not measurably processive.<sup>27,31</sup> Finally, the shallower slope and more  
574 positive x-intercept in BRB80 in Fig. 6A is consistent with charge shielding at higher ionic strength  
575 reducing the impact of electrostatic interactions on the run length.

576  
577 We also found that in near-physiological ionic strength buffer, swapping the KIF1A K-loop into  
578 kinesin-1 did not confer superprocessivity on this motor (Fig. 2). This result suggests that the  
579 KIF1A chemomechanical cycle is tuned such that it relies on the K-loop to achieve  
580 superprocessivity, whereas the kinesin-1 chemomechanical cycle is tuned to rely on different  
581 mechanisms to achieve processivity. One potential explanation is that because kinesin-1 spends a  
582 much smaller fraction of its ATP hydrolysis cycle in a one-head bound vulnerable state than  
583 KIF1A,<sup>15,36</sup> altering the microtubule affinity of this state has a negligible effect on the run length.  
584 However, the microtubule detachment rate of kinesin-1 in the weak-binding ADP state was not  
585 altered by swapping in the KIF1A K-loop (Fig. 3D), arguing against this mechanism and  
586 suggesting instead that the positive charge in the K-loop cannot stabilize this vulnerable state in  
587 kinesin-1 the way it can in KIF1A. One possibility is that during transient episodes when the motor  
588 domain is tethered to the microtubule solely by its K-loop, KIF1A rebinds rapidly through its  
589 canonical microtubule binding site to maintain association, whereas kinesin-1 rebinds more slowly  
590 and instead dissociates from this tethered state despite the added electrostatic interactions. This  
591 difference in weak-binding characteristics suggests that binding of kinesin-1 to the microtubule in

592 the ADP state is dominated by a different region of the microtubule binding domain, such as Loop-  
593 8 or Loop-11/ $\alpha$ -4.<sup>55</sup>

594

595 There are a number of documented KAND mutations in the well-conserved ‘PYRD’ sequence at  
596 the carboxyl end of loop-12,<sup>14</sup> but how these mutations alter the chemomechanical cycle or the  
597 interaction of KIF1A with the microtubule is not clear. Despite a recent report that an R307Q  
598 mutant partially rescues vesicle transport in a null-mutant worm,<sup>51</sup> we found that R307Q and  
599 R307Q were incapable of productive movement in either BRB80 or BRB12 (Fig. 5). Published  
600 molecular dynamics simulations found that R307 in KIF1A (and the equivalent R278 in kinesin-  
601 1) interact electrostatically with residues in the tubulin core, and thus likely contribute to the  
602 strength of microtubule binding.<sup>55,56</sup> The calculated binding free energies between R307 and  
603 residues in tubulin were similar between the strong-binding ATP and Apo states and the weak-  
604 binding ADP state in that work,<sup>55</sup> suggesting that R307 is not involved in nucleotide-dependent  
605 changes in microtubule binding affinity that occur through the KIF1A mechanochemical cycle.  
606 However, the lack of motility of the R307 mutants suggests this residue plays a key role in  
607 mechanochemical coupling in the motor domain and/or the strong binding interaction needed for  
608 stepping. On the other hand, the diffusive binding of both R307P and R307Q suggest that these  
609 mutations do not prevent the K-loop from interacting with the C-terminal tail of tubulin. A nearby  
610 mutation, P305L, was previously proposed to alter the interaction of the K-loop with the  
611 microtubule based on a ~35-fold reduction in the single-molecule landing rate.<sup>52</sup> That work was  
612 carried out in a ~160 mM ionic strength HEPES buffer at pH 7.4, though a different study using  
613 ~80 mM ionic strength HEPES buffer at pH 7.2 found only a two-fold decrease in the landing rate.  
614 <sup>14</sup> Using a biochemical assay in BRB12 (26 mM ionic strength, pH 6.9) that is robust to variations  
615 in motor activity between constructs, we found a 3.5-fold decrease in the bimolecular on-rate for  
616 P305L. This on-rate suppression was smaller than the effect of mutations that neutralized the  
617 charge of the K-loop (see Table 3), which suggests that at low ionic strength the P305L mutation  
618 does not inhibit the interaction of the K-loop with the C-terminal tail of tubulin. Notably, we failed  
619 to observe any motility of P305L in BRB80 (173 mM ionic strength, pH 6.9), which is consistent  
620 with the inability of P305L to rescue vesicle motility in a null worm.<sup>52</sup> Hence, the effect of  
621 different KAND mutations on microtubule binding and chemomechanical coupling are highly  
622 dependent on experimental conditions, and further work is needed to connect the structural

623 changes with alterations in motility, as well as how changes in the motile properties translate to  
624 defects in axonal transport.

625

626 The present study highlights different chemomechanical tuning strategies that kinesin-1 and  
627 kinesin-3 employ to carry out their intracellular transport functions. KIF1A is notable in being fast  
628 and superprocessive, and it does this by spending most of its hydrolysis cycle in a vulnerable one-  
629 head-bound state that is stabilized by electrostatic interactions between the K-loop and the  
630 microtubule. Importantly, this strategy causes the motor to detach readily under load, which is  
631 seemingly not an advantageous property for a transport motor.<sup>19-22</sup> However, KIF1A binds to the  
632 microtubule from solution at a much faster rate than kinesin-1, which may partly compensate for  
633 this detachment.<sup>15</sup> In contrast, kinesin-1 is able to walk processively against substantial loads,<sup>20,22</sup>  
634 but it walks more slowly, it binds to the microtubule out of solution more slowly, and in the absence  
635 of load has a considerably shorter run length.<sup>15,31</sup> As the mechanistic features of these motors  
636 become clarified, the next step is to understand how these functional properties scale up to  
637 multimotor cargo transport on diverse microtubules and bidirectional tug-of-war transport with  
638 dynein. Similarly, to understand how specific mutations lead to KAND disease states, it will be  
639 necessary to define the effect of other mutations on KIF1A chemomechanics and to extrapolate  
640 how those changes affect neuronal function.

## 641 **Methods**

### 642 *Protein Preparation*

643  
644 *Rattus norvegicus* KIF1A motor constructs were based on previous work.<sup>15</sup> The 1A<sub>393</sub> construct,  
645 used as the ‘wild type’ throughout this study, included the KIF1A motor head, neck linker, and  
646 neck-coil domains (residues 1-393) followed by the *D. melanogaster* kinesin-1 neck-coil and  
647 coiled-coil 1 domains (residues 345 to 560), and C-terminal GFP tag for single-molecule assays,  
648 or *D. melanogaster* kinesin-1 neck-coil (residues 345 to 406) for biochemical assays. The 1A<sub>368</sub>  
649 construct consisted of the KIF1A motor head and the neck linker domains (residues 1-368)  
650 followed by the *D. melanogaster* kinesin-1 coil domains for stable dimerization (same residues  
651 and tags as used above for 1A<sub>393</sub>). The 1A-LZ construct was composed of *R. norvegicus* KIF1A  
652 residues 1-393 followed by a leucine zipper domain (see Fig. S2 for sequence) for stable  
653 dimerization and a C-terminal GFP tag.<sup>32</sup> Subsequent constructs used throughout this study  
654 introduced mutations (as described in the Results) using the 1A<sub>393</sub> construct as the template. All  
655 proteins contained a C-terminal His<sub>6</sub> tag. Plasmids were designed in SnapGene and mutants were  
656 generated via Gibson assembly (Gibson Assembly® Cloning Kit from New England Biolabs)<sup>57,58</sup>  
657 or via QuickChange (Q5® Site-Directed Mutagenesis Kit from New England Biolabs).<sup>59</sup>  
658 Recombinant expression of motors in *E. coli* and purification via Ni-NTA chromatography were  
659 performed as described previously.<sup>15</sup>

660

### 661 *Single Molecule Fluorescence Tracking*

662 Single-molecule TIRF microscopy assays were performed as previously described.<sup>15,40,42</sup> Flow  
663 cells were injected sequentially with casein for surface blocking, rigor motors for binding  
664 microtubules to the surface,<sup>36</sup> and taxol-stabilized microtubules in BRB80 (80 mM PIPES, 1 mM  
665 EGTA, 1 mM MgCl<sub>2</sub>, pH 6.9). The imaging buffer mixture was BRB80 with 20 mM D-glucose,  
666 0.02 mg/ml glucose oxidase, 0.008 mg/ml catalase, and 10 mM DTT (dithiothreitol). Motors were  
667 diluted in imaging buffer with 0.5 mg/ml casein and 2 mM ADP/ATP (and equal molar MgCl<sub>2</sub>).  
668 Videos were recorded at 10 frames per second in most cases, except 20 or 50 fps in ADP and  
669 BRB80 and 5 fps in ADP or ATP and BRB12. Kymograph analysis was carried out manually with  
670 ImageJ. To eliminate bias, all traces below 3 pixels (along the distance axis for ATP assays and  
671 the time axis for ADP assays) were excluded from the data set. Fits to the data distributions were

672 done using MATLAB R2020b (MathWorks). The cutoff for the fits in the 1-CDF plots was  
673 determined as 3x the pixel value (i.e. 0.17  $\mu\text{m}$  for run length in ATP assays or 0.3 s for ADP dwell  
674 time assays done at 10 fps). Statistical analysis was carried out using GraphPad Prism7 t-test  
675 function (Kolmogorov-Smirnov test) to determine significance relative to the control.

676

#### 677 *Stopped Flow Assays*

678 Stopped Flow assays, including  $k_{\text{on}}^{\text{Mt}}$  and ATP-triggered Half-Site Release were performed as  
679 previously described.<sup>15</sup> Concentrations mentioned below refer to the ‘syringe concentrations’ and  
680 the final concentrations in the chamber were half. The  $k_{\text{on}}^{\text{Mt}}$  assays in BRB80 were performed by  
681 flushing 300 nM of active motor dimers in 0.5  $\mu\text{M}$  mant-ADP against 2 mM Mg-ADP and varying  
682 concentrations of taxol-stabilized microtubules (0.5 - 5  $\mu\text{M}$ ). In BRB12, 300 nM of active motor  
683 dimers in 5  $\mu\text{M}$  mant-ADP were flushed against 2 mM Mg-ATP and varying concentrations of  
684 taxol-stabilized microtubules (0.1 – 0.5  $\mu\text{M}$ ). The ATP-triggered Half-Site Release assays were  
685 performed by incubating 0.5  $\mu\text{M}$  active motor dimers with 6  $\mu\text{M}$  of taxol-stabilized microtubules  
686 and 1  $\mu\text{M}$  of excess mant-ADP to form a one-head-bound complex in solution. This complex was  
687 then flushed against varied concentrations of Mg-ATP.

688

#### 689 *Microtubule Pelleting Assays*

690 In microtubule pelleting assays, GFP-labeled motors were incubated with varying concentrations  
691 of taxol-stabilized microtubules with 2 mM ADP or ATP. After a 5 minute incubation at room  
692 temperature, the solutions were spun down using an Airfuge at 30 psi for 10 minutes. A Molecular  
693 Devices FlexStation 3 Multimode Microplate Reader was used to measure the GFP concentration  
694 of the pellet and supernatant. Reported values (% pellet) were calculated as the fluorescence of the  
695 pellet divided by the sum of the pellet and supernatant. All values were normalized to a control  
696 value of motors in 2 mM AMPPNP and 20  $\mu\text{M}$  taxol-stabilized microtubules.

697 **References**

- 698 (1) Hirokawa, N., Noda, Y. Intracellular Transport and Kinesin Superfamily Proteins,  
699 KIFs: Structure, Function, and Dynamics. *Physiol Rev* **2008**, *88* (3), 1089–1118.
- 700 (2) Miki, H., Setou, M., Kaneshiro, K., Hirokawa, N. All Kinesin Superfamily Protein,  
701 KIF, Genes in Mouse and Human. *Proceedings of the National Academy of Sciences*  
702 **2001**, *98* (13), 7004–7011.
- 703 (3) Hirokawa, N., Noda, Y., Tanaka, Y., Niwa, S. Kinesin Superfamily Motor Proteins  
704 and Intracellular Transport. *Nat Rev Mol Cell Biol* **2009**, *10*, 682–696.
- 705 (4) Niwa, S., Lipton, D. M., Morikawa, M., Zhao, C., Hirokawa, N., Lu, H., Shen, K.  
706 Autoinhibition of a Neuronal Kinesin UNC-104/KIF1A Regulates the Size and  
707 Density of Synapses. *Cell Rep* **2016**, *16* (8), 2129–2141.
- 708 (5) Yonekawa, Y., Harada, A., Okada, Y., Funakoshi, T., Kanai, Y., Takei, Y., Terada,  
709 S., Noda, T., Hirokawa, N. Defect in Synaptic Vesicle Precursor Transport and  
710 Neuronal Cell Death in KIF1A Motor Protein–Deficient Mice. *Journal of Cell*  
711 *Biology* **1998**, *141* (2), 431–441.
- 712 (6) Vecchia, S. della, Tessa, A., Dosi, C., Baldacci, J., Pasquariello, R., Antenora, A.,  
713 Astrea, G., Bassi, M. T., Battini, R., Casali, C., Cioffi, E., Conti, G., de Michele, G.,  
714 Ferrari, A. R., Filla, A., Fiorillo, C., Fusco, C., Gallone, S., Germiniasi, C., Guerrini,  
715 R., Haggiag, S., Lopergolo, D., Martinuzzi, A., Melani, F., Mignarri, A., Panzeri, E.,  
716 Pini, A., Pinto, A. M., Pochiero, F., Primiano, G., Procopio, E., Renieri, A.,  
717 Romaniello, R., Sancricca, C., Servidei, S., Spagnoli, C., Ticci, C., Rubegni, A.,  
718 Santorelli, F. M. Monoallelic KIF1A-Related Disorders: A Multicenter Cross  
719 Sectional Study and Systematic Literature Review. *J Neurol* **2022**, *269* (1), 437–450.
- 720 (7) Anazawa, Y., Kita, T., Iguchi, R., Hayashi, K., Niwa, S. De Novo Mutations in  
721 KIF1A-Associated Neuronal Disorder (KAND) Dominant-Negatively Inhibit Motor  
722 Activity and Axonal Transport of Synaptic Vesicle Precursors. *Proceedings of the*  
723 *National Academy of Sciences* **2022**, *119* (32).
- 724 (8) Esmaeli Nieh, S., Madou, M. R. Z. Z., Sirajuddin, M., Fregeau, B., McKnight, D.,  
725 Lexa, K., Strober, J., Spaeth, C., Hallinan, B. E., Smaoui, N., Pappas, J. G., Burrow,  
726 T. A., McDonald, M. T., Latibashvili, M., Leshinsky-Silver, E., Lev, D., Blumkin,  
727 L., Vale, R. D., Barkovich, A. J., Sherr, E. H. De Novo Mutations in KIF1A Cause

- 728 Progressive Encephalopathy and Brain Atrophy. *Ann Clin Transl Neurol* **2015**, 2 (6),  
729 623–635.
- 730 (9) Pennings, M., Schouten, M. I., van Gaalen, J., Meijer, R. P. P. P., de Bot, S. T., Kriek,  
731 M., Saris, C. G. J. J., van den Berg, L. H., van Es, M. A., Zuidgeest, D. M. H. H.,  
732 Elting, M. W., van de Kamp, J. M., van Spaendonck-Zwarts, K. Y., Die-Smulders,  
733 C. de, Brilstra, E. H., Verschuuren, C. C., de Vries, B. B. A. A., Bruijn, J., Sofou, K.,  
734 Duijkers, F. A., Jaeger, B., Schieving, J. H., van de Warrenburg, B. P., Kamsteeg,  
735 E.-J. KIF1A Variants Are a Frequent Cause of Autosomal Dominant Hereditary  
736 Spastic Paraplegia. *European Journal of Human Genetics* **2020**, 28 (1), 40–49.
- 737 (10) Ohba, C., Haginoya, K., Osaka, H., Kubota, K., Ishiyama, A., Hiraide, T., Komaki,  
738 H., Sasaki, M., Miyatake, S., Nakashima, M., Tsurusaki, Y., Miyake, N., Tanaka, F.,  
739 Saito, H., Matsumoto, N. De Novo KIF1A Mutations Cause Intellectual Deficit,  
740 Cerebellar Atrophy, Lower Limb Spasticity and Visual Disturbance. *J Hum Genet*  
741 **2015**, 60 (12), 739–742.
- 742 (11) Krenn, M., Zulehner, G., Hotzy, C., Rath, J., Stogmann, E., Wagner, M., Haack, T.  
743 B., Strom, T. M., Zimprich, A., Zimprich, F. Hereditary Spastic Paraplegia Caused  
744 by Compound Heterozygous Mutations Outside the Motor Domain of the KIF1A  
745 Gene. *Eur J Neurol* **2017**, 24 (5), 741–747.
- 746 (12) Hotchkiss, L., Donkervoort, S., Leach, M. E., Mohassel, P., Bharucha-Goebel, D. X.,  
747 Bradley, N., Nguyen, D., Hu, Y., Gurgel-Giannetti, J., Bönnemann, C. G. Novel de  
748 Novo Mutations in KIF1A as a Cause of Hereditary Spastic Paraplegia with  
749 Progressive Central Nervous System Involvement. *J Child Neurol* **2016**, 31 (9),  
750 1114–1119.
- 751 (13) Nemani, T., Steel, D., Kaliakatsos, M., DeVile, C., Ververi, A., Scott, R., Getov, S.,  
752 Sudhakar, S., Male, A., Mankad, K., Muntoni, F., Reilly, M. M., Kurian, M. A., Carr,  
753 L., Munot, P. KIF1A -related Disorders in Children: A Wide Spectrum of Central  
754 and Peripheral Nervous System Involvement. *Journal of the Peripheral Nervous*  
755 *System* **2020**, 25 (2), 117–124.
- 756 (14) Boyle, L., Rao, L., Kaur, S., Fan, X., Mebane, C., Hamm, L., Thornton, A.,  
757 Ahrends, J. T., Anderson, M. P., Christodoulou, J., Gennerich, A., Shen, Y.,  
758 Chung, W. K. Genotype and Defects in Microtubule-Based Motility Correlate with

- 759 Clinical Severity in KIF1A-Associated Neurological Disorder. *Human Genetics and*  
760 *Genomics Advances* **2021**, 2 (2), 100026.
- 761 (15) Zaniewski, T. M., Gicking, A. M., Fricks, J., Hancock, W. O. A Kinetic Dissection  
762 of the Fast and Superprocessive Kinesin-3 KIF1A Reveals a Predominant One-Head-  
763 Bound State during Its Chemomechanical Cycle. *Journal of Biological Chemistry*  
764 **2020**, 295 (52), 17889–17903.
- 765 (16) Taylor, E. W., Borisy, G. G. Kinesin Processivity. *Journal of Cell Biology* **2000**, 151  
766 (5), 1998–2000.
- 767 (17) Mickolajczyk, K. J., Hancock, W. O. Kinesin Processivity Is Determined by a Kinetic  
768 Race from a Vulnerable One-Head-Bound State. *Biophys J* **2017**, 112 (12), 2615–  
769 2623.
- 770 (18) Hancock, W. O., Howard, J. Kinesin’s Processivity Results from Mechanical and  
771 Chemical Coordination between the ATP Hydrolysis Cycles of the Two Motor  
772 Domains. *Proc Natl Acad Sci U S A* **1999**, 96 (23), 13147–13152.
- 773 (19) Arpağ, G., Norris, S. R., Mousavi, S. I., Soppina, V., Verhey, K. J., Hancock, W. O.,  
774 Tüzel, E. Motor Dynamics Underlying Cargo Transport by Pairs of Kinesin-1 and  
775 Kinesin-3 Motors. *Biophys J* **2019**, 116 (6), 1115–1126.
- 776 (20) Pyrpassopoulou, S., Gicking, A. M., Zaniewski, T. M., Hancock, W. O., Ostapa, E.  
777 M. KIF1A Is Kinetically Tuned to Be a Super-Engaging Motor under Hindering  
778 Loads. *bioRxiv* **2022**, No. 2022.05.16.492183, 1–45.
- 779 (21) Arpağ, G., Shastry, S., Hancock, W. O., Tüzel, E. Transport by Populations of Fast  
780 and Slow Kinesins Uncovers Novel Family-Dependent Motor Characteristics  
781 Important for In Vivo Function. *Biophys J* **2014**, 107 (8), 1896–1904.
- 782 (22) Budaitis, B. G., Jariwala, S., Rao, L., Yue, Y., Sept, D., Verhey, K. J., Gennerich, A.  
783 Pathogenic Mutations in the Kinesin-3 Motor KIF1A Diminish Force Generation and  
784 Movement through Allosteric Mechanisms. *Journal of Cell Biology* **2021**, 220 (4).
- 785 (23) Okada, Y., Hirokawa, N. A Processive Single-Headed Motor: Kinesin Superfamily  
786 Protein KIF1A. *Science* **1999**, 283 (5405), 1152–1157.
- 787 (24) Okada, Y., Higuchi, H., Hirokawa, N. Processivity of the Single-Headed Kinesin  
788 KIF1A through Binding to Tubulin. *Nature* **2003**, 424 (6948), 574–577.



- 789 (25) Okada, Y., Hirokawa, N. Mechanism of the Single-Headed Processivity: Diffusional  
790 Anchoring between the K-Loop of Kinesin and the C Terminus of Tubulin.  
791 *Proceedings of the National Academy of Sciences* **2000**, 97 (2), 640–645.
- 792 (26) Nitta, R., Kikkawa, M., Okada, Y., Hirokawa, N. KIF1A Alternately Uses Two  
793 Loops to Bind Microtubules. *Science* **2004**, 305 (5684), 678–683.
- 794 (27) Lessard, D. v., Zinder, O. J., Hotta, T., Verhey, K. J., Ohi, R., Berger, C. L.  
795 Polyglutamylation of Tubulin’s C-Terminal Tail Controls Pausing and Motility of  
796 Kinesin-3 Family Member KIF1A. *Journal of Biological Chemistry* **2019**, 294 (16),  
797 6353–6363.
- 798 (28) Janke, C., Magiera, M. M. The Tubulin Code and Its Role in Controlling Microtubule  
799 Properties and Functions. *Nat Rev Mol Cell Biol* **2020**, 21 (6), 307–326.
- 800 (29) Roll-Mecak, A. The Tubulin Code in Microtubule Dynamics and Information  
801 Encoding. *Dev Cell* **2020**, 54 (1), 7–20.
- 802 (30) Tomishige, M., Klopfenstein, D. R., Vale, R. D. Conversion of Unc104/KIF1A  
803 Kinesin into a Processive Motor After Dimerization. *Science* **2002**, 297 (5590),  
804 2263–2267.
- 805 (31) Soppina, V., Verhey, K. J. The Family-Specific K-Loop Influences the Microtubule  
806 on-Rate but Not the Superprocessivity of Kinesin-3 Motors. *Mol Biol Cell* **2014**, 25  
807 (14), 2161–2170.
- 808 (32) Soppina, V., Norris, S. R., Dizaji, A. S., Kortus, M., Veatch, S., Peckham, M.,  
809 Verhey, K. J. Dimerization of Mammalian Kinesin-3 Motors Results in  
810 Superprocessive Motion. *Proceedings of the National Academy of Sciences* **2014**,  
811 111 (15), 5562–5567.
- 812 (33) Ren, J., Wang, S., Chen, H., Wang, W., Huo, L., Feng, W. Coiled-Coil 1-Mediated  
813 Fastening of the Neck and Motor Domains for Kinesin-3 Autoinhibition.  
814 *Proceedings of the National Academy of Sciences* **2018**, 115 (51), E11933–E11942.
- 815 (34) Ren, J., Zhang, Y., Wang, S., Huo, L., Lou, J., Feng, W. Structural Delineation of the  
816 Neck Linker of Kinesin-3 for Processive Movement. *J Mol Biol* **2018**, 430 (14),  
817 2030–2041.

- 818 (35) Feng, Q., Mickolajczyk, K. J., Chen, G.-Y., Hancock, W. O. Motor Reattachment  
819 Kinetics Play a Dominant Role in Multimotor-Driven Cargo Transport. *Biophys J*  
820 **2018**, *114* (2), 400–409.
- 821 (36) Mickolajczyk, K. J., Deffenbaugh, N. C., Ortega Arroyo, J., Andrecka, J., Kukura,  
822 P., Hancock, W. O. Kinetics of Nucleotide-Dependent Structural Transitions in the  
823 Kinesin-1 Hydrolysis Cycle. *Proceedings of the National Academy of Sciences* **2015**,  
824 *112* (52), E7186–E7193.
- 825 (37) Huang, T.-G., Suhan, J., Hackney, D. D. Drosophila Kinesin Motor Domain  
826 Extending to Amino Acid Position 392 Is Dimeric When Expressed in Escherichia  
827 Coli. *J Biol Chem* **1994**, *269* (23), 16502–16507.
- 828 (38) Thorn, K. S., Ubersax, J. A., Vale, R. D. Engineering the Processive Run Length of  
829 the Kinesin Motor. *Journal of Cell Biology* **2000**, *151* (5), 1093–1100.
- 830 (39) Hughes, J., Hancock, W. O., Fricks, J. Kinesins with Extended Neck Linkers: A  
831 Chemomechanical Model for Variable-Length Stepping. *Bull Math Biol* **2012**, *74* (5),  
832 1066–1097.
- 833 (40) Shastry, S., Hancock, W. O. Neck Linker Length Determines the Degree of  
834 Processivity in Kinesin-1 and Kinesin-2 Motors. *Current Biology* **2010**, *20* (10), 939–  
835 943.
- 836 (41) Shastry, S., Hancock, W. O. Interhead Tension Determines Processivity across  
837 Diverse N-Terminal Kinesins. *Proceedings of the National Academy of Sciences*  
838 **2011**, *108* (39), 16253–16258.
- 839 (42) Chen, G.-Y., Arginteanu, D. F. J., Hancock, W. O. Processivity of the Kinesin-2  
840 KIF3A Results from Rear Head Gating and Not Front Head Gating. *Journal of*  
841 *Biological Chemistry* **2015**, *290* (16), 10274–10294.
- 842 (43) Hariharan, V., Hancock, W. O. Insights into the Mechanical Properties of the Kinesin  
843 Neck Linker Domain from Sequence Analysis and Molecular Dynamics Simulations.  
844 *Cell Mol Bioeng* **2009**, *2* (2), 177–189.
- 845 (44) Kozielski, F., Sack, S., Marx, A., Thorma, M. The Crystal Structure of Dimeric  
846 Kinesin and Implications for Microtubule-Dependent Motility. **1997**, *91*, 985–994.

- 847 (45) Mouat, M. F., Manchester, K. L. The Intracellular Ionic Strength of Red Cells and  
848 the Influence of Complex Formation. *Comparative Haematology International* **1998**,  
849 8 (1), 58–60.
- 850 (46) Dill, K. A., Bromberg, S., Stigter, D. *Molecular Driving Forces: Statistical*  
851 *Thermodynamics in Biology, Chemistry, Physics, and Nanoscience*; Garland Science,  
852 2010.
- 853 (47) Cheng, J. Q., Jiang, W., Hackney, D. D. Interaction of Mant-Adenosine Nucleotides  
854 and Magnesium with Kinesin. *Biochemistry* **1998**, 37 (15), 5288–5295.
- 855 (48) Hackney, D. D., Malik, A. S., Wright, K. W. Nucleotide-Free Kinesin Hydrolyzes  
856 ATP with Burst Kinetics. *J Biol Chem* **1989**, 264 (27), 15943–15948.
- 857 (49) Hackney, D. D. Evidence for Alternating Head Catalysis by Kinesin during  
858 Microtubule-Stimulated ATP Hydrolysis. *Proc Natl Acad Sci U S A* **1994**, 91 (15),  
859 6865–6869.
- 860 (50) Ma, Y.-Z., Taylor, E. W. Interacting Head Mechanism of Microtubule-Kinesin  
861 ATPase. *Journal of Biological Chemistry* **1997**, 272 (2), 724–730.
- 862 (51) Chiba, K., Takahashi, H., Chen, M., Obinata, H., Arai, S., Hashimoto, K., Oda, T.,  
863 McKenney, R. J., Niwa, S. Disease-Associated Mutations Hyperactivate KIF1A  
864 Motility and Anterograde Axonal Transport of Synaptic Vesicle Precursors.  
865 *Proceedings of the National Academy of Sciences* **2019**, 116 (37), 18429–18434.
- 866 (52) Lam, A. J., Rao, L., Anazawa, Y., Okada, K., Chiba, K., Dacy, M., Niwa, S.,  
867 Gennerich, A., Nowakowski, D. W., McKenney, R. J. A Highly Conserved 310 Helix  
868 within the Kinesin Motor Domain Is Critical for Kinesin Function and Human  
869 Health. *Sci Adv* **2021**, 7 (18), 1–15.
- 870 (53) Hirokawa, N. Kinesin and Dynein Superfamily Proteins and the Mechanism of  
871 Organelle Transport. *Science* **1998**, 279 (5350), 519–526.
- 872 (54) Rashid, D. J., Bononi, J., Tripet, B. P., Hodges, R. S., Pierce, D. W. Monomeric and  
873 Dimeric States Exhibited by the Kinesin-Related Motor Protein KIF1A. *Journal of*  
874 *Peptide Research* **2005**, 65 (6), 538–549.
- 875 (55) Scarabelli, G., Soppina, V., Yao, X. Q., Atherton, J., Moores, C. A., Verhey, K. J.,  
876 Grant, B. J. Mapping the Processivity Determinants of the Kinesin-3 Motor Domain.  
877 *Biophys J* **2015**, 109 (8), 1537–1540.

- 878 (56) Grant, B. J., Gheorghe, D. M., Zheng, W., Alonso, M., Huber, G., Dlugosz, M.,  
879 McCammon, J. A., Cross, R. A. Electrostatically Biased Binding of Kinesin to  
880 Microtubules. *PLoS Biol* **2011**, 9 (11), 1001207.
- 881 (57) Gibson, D. G., Glass, J. I., Lartigue, C., Noskov, V. N., Chuang, R. Y., Algire, M.  
882 A., Benders, G. A., Montague, M. G., Ma, L., Moodie, M. M., Merryman, C., Vashee,  
883 S., Krishnakumar, R., Assad-Garcia, N., Andrews-Pfannkoch, C., Denisova, E. A.,  
884 Young, L., Qi, Z. N., Segall-Shapiro, T. H., Calvey, C. H., Parmar, P. P., Hutchison,  
885 C. A., Smith, H. O., Venter, J. C. Creation of a Bacterial Cell Controlled by a  
886 Chemically Synthesized Genome. *Science* **2010**, 329 (5987), 52–56.
- 887 (58) Gibson, D. G., Young, L., Chuang, R. Y., Venter, J. C., Hutchison, C. A., Smith, H.  
888 O. Enzymatic Assembly of DNA Molecules up to Several Hundred Kilobases. *Nat*  
889 *Methods* **2009**, 6 (5), 343–345.
- 890 (59) Papworth, C., Bauer, J. C., Braman, J., Wright, D. A. Site-Directed Mutagenesis in  
891 One Day with >80% Efficiency. *Strategies* **1996**, 9 (3), 3–4.
- 892

**The net charge of the K-loop regulates KIF1A superprocessivity by enhancing microtubule affinity in the one-head-bound state**

Taylor M. Zaniewski and William O. Hancock

Departments of Chemistry and Biomedical Engineering, Pennsylvania State University,  
University Park, Pennsylvania, USA

**Supplemental Information**

## A 2 mM ATP

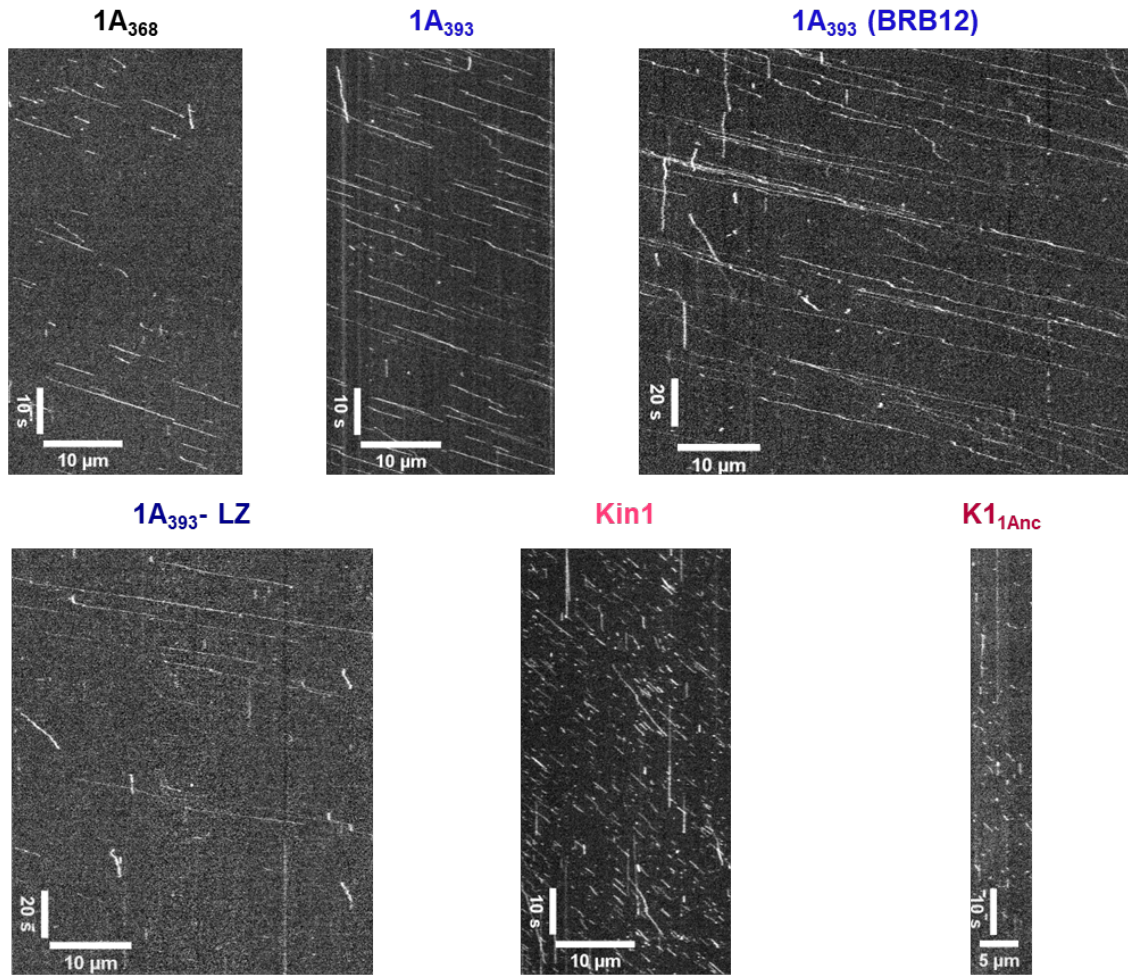

## B 2 mM ADP

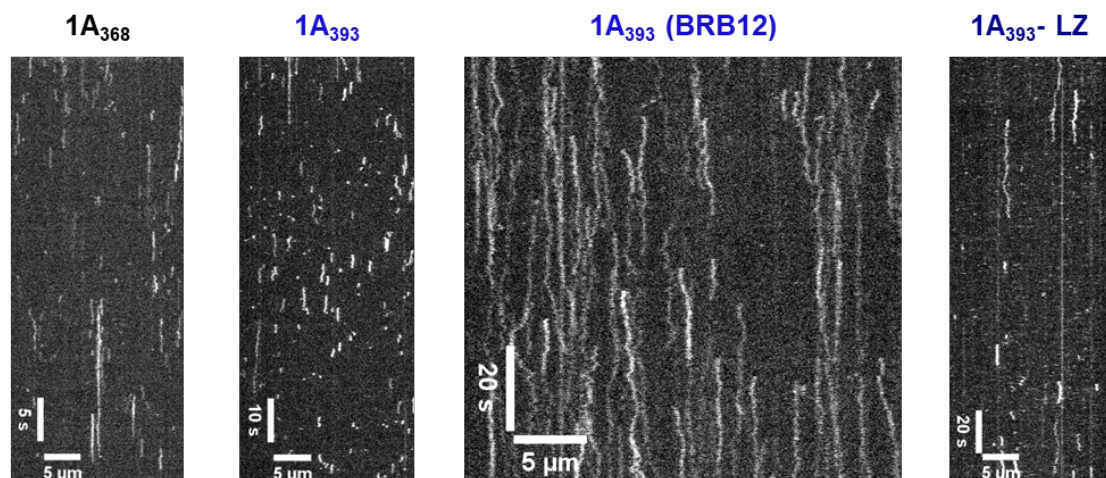

Figure S1: Example kymographs for different KIF1A and Kin1 constructs in ATP and ADP

**A**, Kymograph of each construct in 2 mM ATP and BRB80 (unless otherwise noted). **B**, Kymograph of each construct in 2 mM ADP and BRB80 (unless otherwise noted). Individual kymographs were analyzed from videos at various frame rates; scale bars reflect this distinction.

|                      | Domain                              | Sequence                                                                                                                                                                                                                                           | Total Charges | Net Charge at pH 6.9 | pI  |
|----------------------|-------------------------------------|----------------------------------------------------------------------------------------------------------------------------------------------------------------------------------------------------------------------------------------------------|---------------|----------------------|-----|
| Dimerization Domains | <b>LZ</b>                           | VKQLEDKVEELASKNYHLENEVARLKKLVG                                                                                                                                                                                                                     | (+7, -6)      | + 0.2                | 7.2 |
|                      | <b>LZ + Linker</b>                  | GAGVKQLEDKVEELASKNYHLENEVARLKKLV<br>GVPRAMLVPRGPPVHRLGDPPVAT                                                                                                                                                                                       | (+11, -7)     | + 2.5                | 9.3 |
|                      | <b>K560</b><br>(345-560)            | AEEWKRRYEKEKEKNARLKGKVEKLEIELARW<br>RAGETVKAEEQINMEDLMEASTPNLEVEAAQT<br>AAAEEAALAAQRTALANMSASVAVNEQARLATE<br>CERLYQQLDDKDEEINQSQYAEQLKEQVMEQ<br>EELIANARREYETLQSEMARIQEENESAKEEV<br>KEVLQALEELTVNYDQKSEQEIDNKNKDI DALN<br>EELQKQSVFNAASTE LQQLKDMS | (+28, -49)    | - 21                 | 4.5 |
|                      | <b>KIF1A CC1</b><br>(394-523)       | MTNALVGMSPSSSL SALSSRAASVSSLHERIL<br>FAPGSEEAIERLKETEKI IAE LNETWEEKLRR<br>TEAIRMEREALLAEMGVAMREDDGGTLGVFSPK<br>KTPHLVNLNEDPLMSECLLYIKDGVTRVGRE<br>DA                                                                                              | (+16, -22)    | - 5.5                | 5   |
| Neck Coil Domains    | <b>Kin1 Neck Coil</b><br>(345-405)  | AEEWKRRYEKEKEKNARLKGKVEKLEIELARW<br>RAGETVKAEEQINMEDLMEASTPNLEVEAS                                                                                                                                                                                 | (+13, -16)    | - 3.0                | 5.0 |
|                      | <b>KIF1A Neck Coil</b><br>(369-393) | IRELKDEVTRLRDLLYAQGLGDITD                                                                                                                                                                                                                          | (+4, -6)      | - 2.1                | 4.7 |
|                      | <b>KIF1A NC+CC1</b><br>(369-523)    | IRELKDEVTRLRDLLYAQGLGDITD<br>MTNALVGMSPSSSL SALSSRAASVSSLHERILFAPGSEEA<br>AIEERLKETEKI IAE LNETWEEKLRRTEAIRME<br>REALLAEMGVAMREDDGGTLGVFSPKTPHLVN<br>LNE DPLMSECLLYIKDGVTRVGREDA                                                                   | (+20, -28)    | - 7.4                | 5.0 |

**Figure S2: Charge of the neck coil domains impacts motor properties of KIF1A**

**A**, Table of the different dimerization and neck coil domains used in this study with the sequence, total number of charged residues, net charge of the domain at pH 6.9 and the pI. Net charge and pI were calculated using (<http://protcalc.sourceforge.net/>)

## A 2 mM ATP

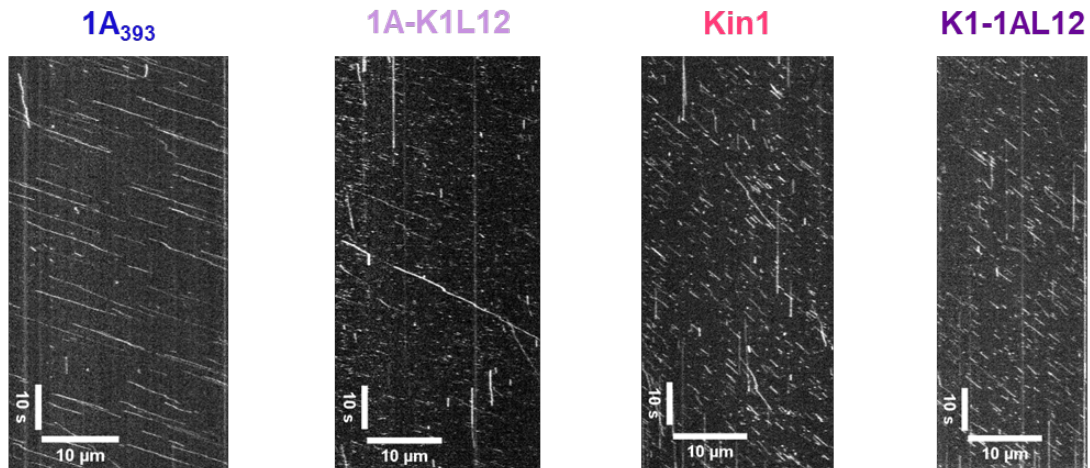

## B 2 mM ADP

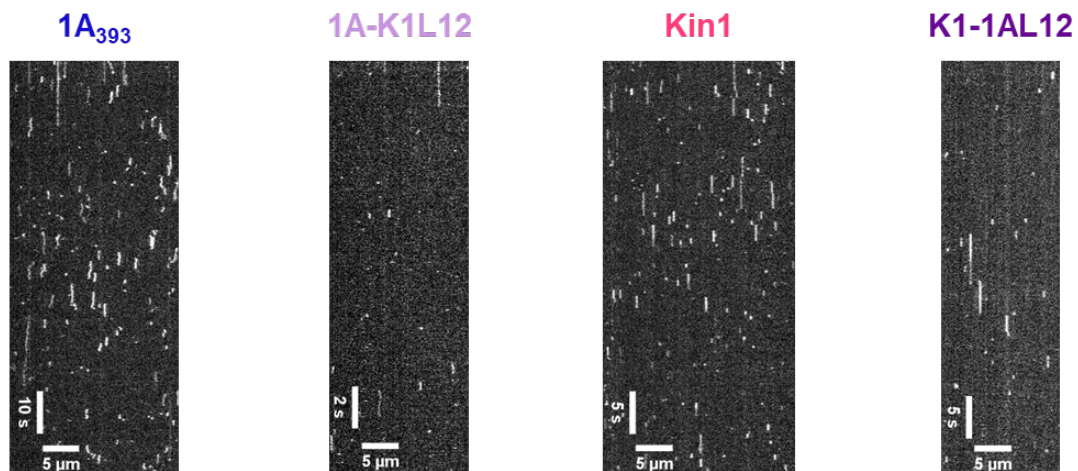

Figure S3: Example kymographs of constructs in ATP and ADP

**A**, Kymographs of different constructs used in Fig. 2, in 2 mM ATP and BRB80. **B**, Kymographs of different constructs used in Fig. 2, in 2 mM ADP and BRB80.



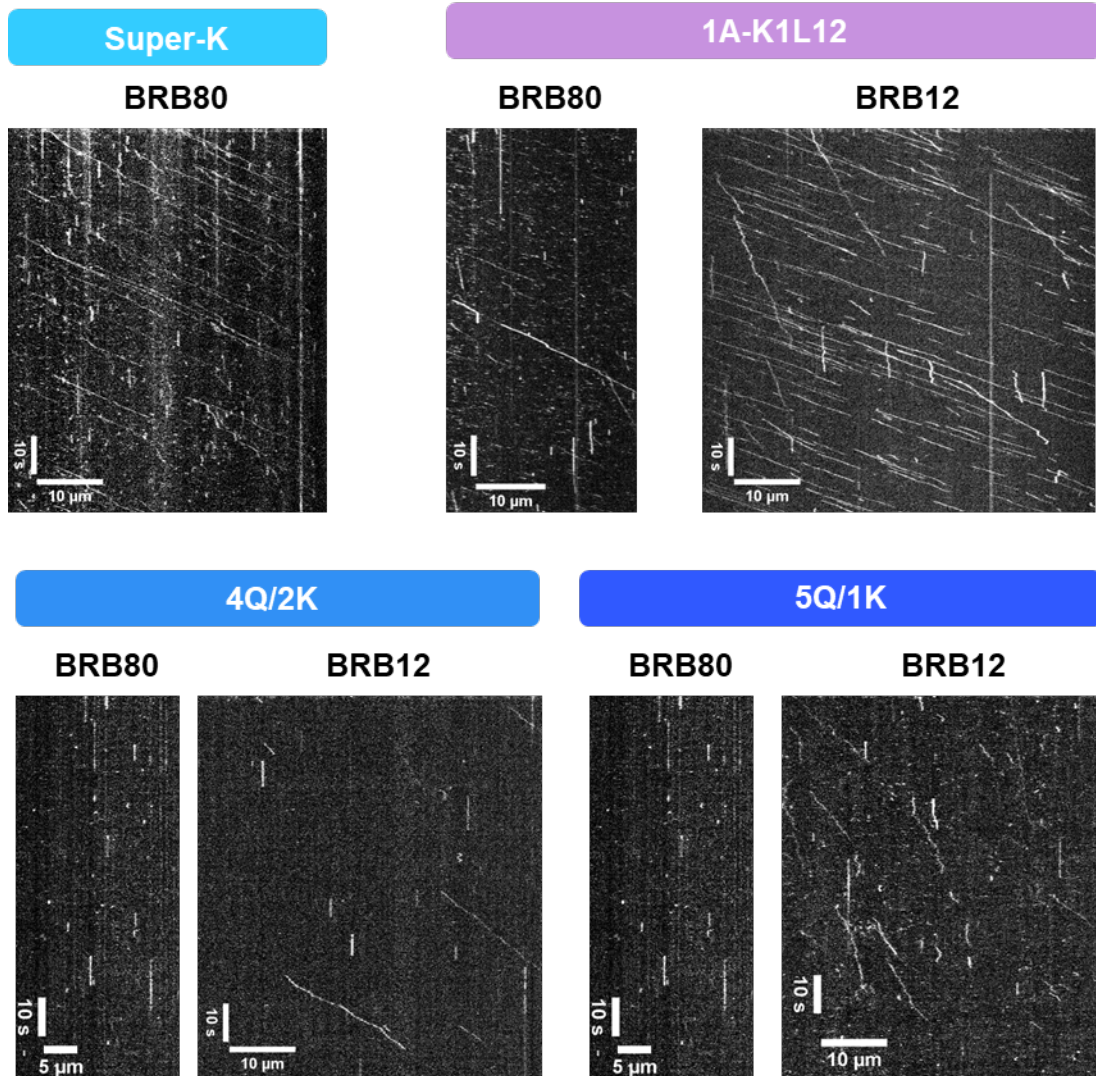

**Figure S4: Example Kymographs of Charge Mutants in BRB80 and BRB12**

Representative kymographs for the data presented in Figure 4.

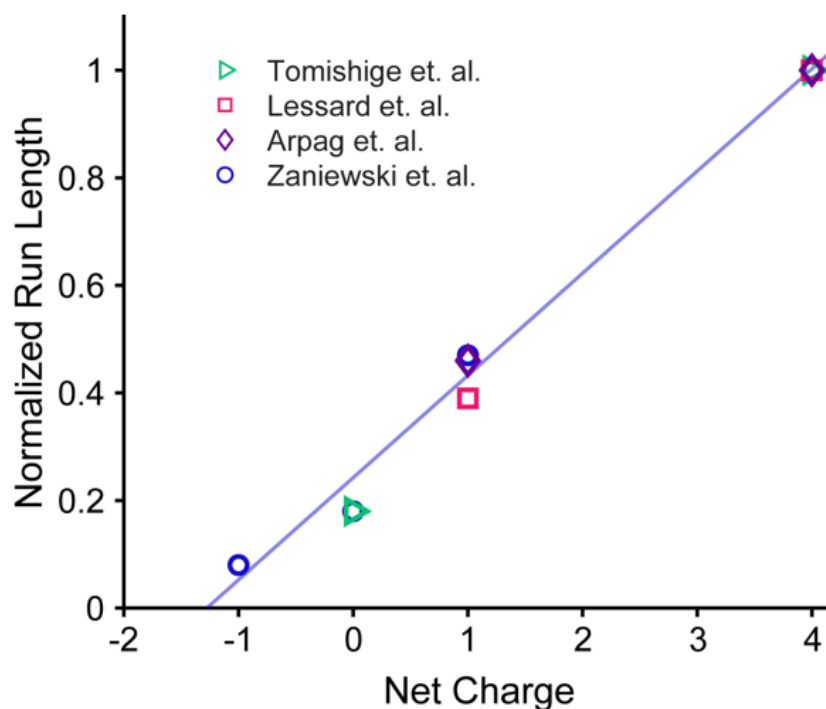

|                                   | Construct         | K-Loop Charge | RL ( $\mu\text{m}$ ) | RL (norm) |
|-----------------------------------|-------------------|---------------|----------------------|-----------|
| Tomishige et. al. <sup>30</sup>   | Unc104-WT         | 4             | 9.5                  | 1         |
|                                   | Unc104-Swap       | 0             | 1.8                  | 0.2       |
| Lessard et. al. <sup>27</sup>     | 1A-WT-LZ          | 4             | 6.2                  | 1         |
|                                   | 1A-3Ala-LZ        | 1             | 2.4                  | 0.4       |
| Arpag et. al. <sup>19</sup>       | 1A-WT-LZ          | 4             | 7.9                  | 1         |
|                                   | 1A-Swap-LZ        | 1             | 3.6                  | 0.5       |
| Zaniewski et. al.<br>(this study) | 1A <sub>393</sub> | 4             | 14.3                 | 1         |
|                                   | 1AK1L12           | 1             | 6.7                  | 0.5       |
|                                   | 1A-4Q             | 0             | 2.6                  | 0.2       |
|                                   | 1A-5Q             | -1            | 1.2                  | 0.1       |

**Figure S5: Published run lengths versus K-loop charge for stably dimerized KIF1A constructs in BRB12**

(Top) Plot of normalized run length versus net charge of Loop-12 for the present study and three published studies. Run lengths are normalized to the respective wild-type value (+4 net charge) for each study. Line represents fit to the relative run length versus charge for the present study (see Figure 5 for plot of non-normalized data). All experiments were performed in 12 mM PIPES buffer using constitutively active KIF1A dimers stabilized by an added coiled-coil domain. (Bottom) Actual and normalized run lengths from the four studies.
